# Supplementary material
Source: PubMed Central journal article supplement (PMC8130606)
Supplement: MD-012-D0MD00436G-s001.pdf [file MD-012-D0MD00436G-s001.pdf]

## Supplementary Information

### Discovery of novel JAK2 and EGFR inhibitors from a series of thiazole-based chalcone derivatives

Thitinan Aiebchun<sup>a,†</sup>, Kamonpan Sanachai<sup>a,†</sup>, Panupong Mahalapbutr<sup>b,†</sup>, Supaphorn Seetaha<sup>c</sup>, Lueacha Tabtimmai<sup>d</sup>, Phornphimon Maitarad<sup>e</sup>, Iakovos Xenikakis<sup>f</sup>, Athina Geronikaki<sup>f</sup>, Kiattawee Choowongkamon<sup>c</sup>, Thanyada Rungrotmongkol<sup>a,g,\*</sup>

<sup>a</sup> Structural and Computational Biology Research Unit, Department of Biochemistry, Faculty of Science, Chulalongkorn University, Bangkok 10330, Thailand

<sup>b</sup> Department of Biochemistry, Faculty of Medicine, Khon Kaen University, Khon Kaen 40002, Thailand

<sup>c</sup> Department of Biochemistry, Faculty of Science, Kasetsart University, Bangkok 10900, Thailand

<sup>d</sup> Department of Biotechnology, Faculty of Applied Science, King Mongkut's University of Technology of North Bangkok, Bangkok, Thailand

<sup>e</sup> Research Center of Nano Science and Technology, Shanghai University, Shanghai 200444, PR China

<sup>f</sup> Department of Pharmaceutical Chemistry, School of Pharmacy, Aristotle University of Thessaloniki, Thessaloniki 54124, Greece

<sup>g</sup> Program in Bioinformatics and Computational Biology, Graduate School, Chulalongkorn University, Bangkok 10330, Thailand

\* Corresponding author. Tel: +662 2185426; Fax: +662 2185418

<sup>†</sup>These three authors contributed equally to this work

E-mail address: t.rungrotmongkol@gmail.com (T. Rungrotmongkol)

## Table of Contents

---

|                                                                                                                                 |     |
|---------------------------------------------------------------------------------------------------------------------------------|-----|
| 1. <b>Figures S1.</b> Superimposition of ligands between X-ray structure and GOLD docking                                       | S1  |
| 2. <b>Figures S2.</b> IC <sub>50</sub> curves of compounds and know drugs towards focused cells                                 | S2  |
| 3. <b>Figures S3.</b> Cytotoxicity of compounds and know drugs towards Vero cells                                               | S3  |
| 4. <b>Figures S4.</b> Kinase inhibitory activity screening of compounds towards JAK2 and<br>EGFR-TK at 1 $\mu$ M                | S4  |
| 5. <b>Figures S5.</b> The fitness scores of focused thiazole derivatives towards JAK2 and EGFR-TK                               | S5  |
| 6. <b>Table S1.</b> Interactions of thiazole-based chalcones derivatives as well as the known drugs<br>towards JAK2 and EGFR-TK | S6  |
| 7. <b>Detail of synthesis and characterization of five compounds (10, 11, 12, 20 and 25)<sup>34</sup></b>                       | S9  |
| 8. <b>Figure S6.</b> IC <sub>50</sub> of kinase inhibitory activity of compounds towards JAK2 and EGFR-TK                       | S10 |

---

## 1. Figures S1

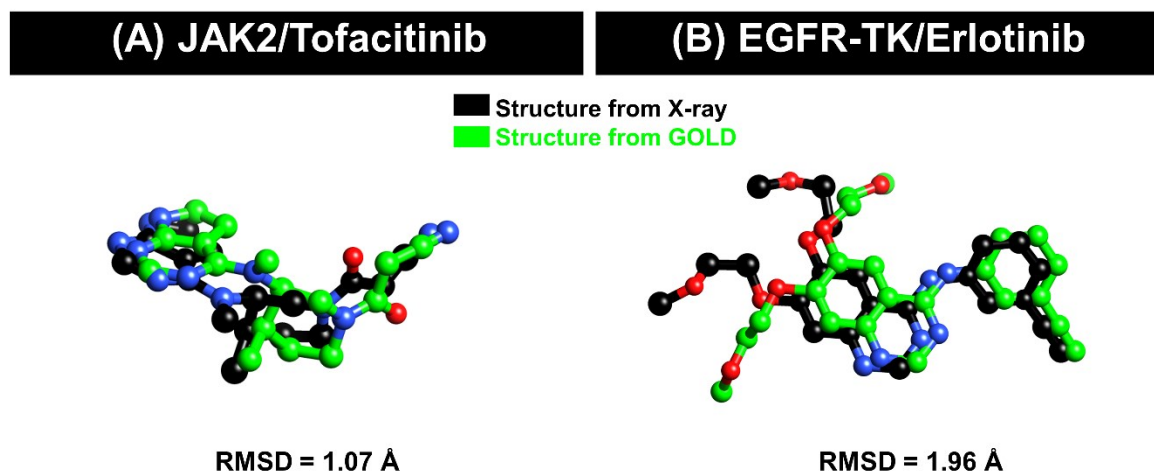

**Figure S1.** Superimposition of ligands between X-ray structure (black) and GOLD docking (green).

JAK2 complexed with tofacitinib (A) and EGFR-TK complexed with erlotinib (B).

## 2. Figures S2

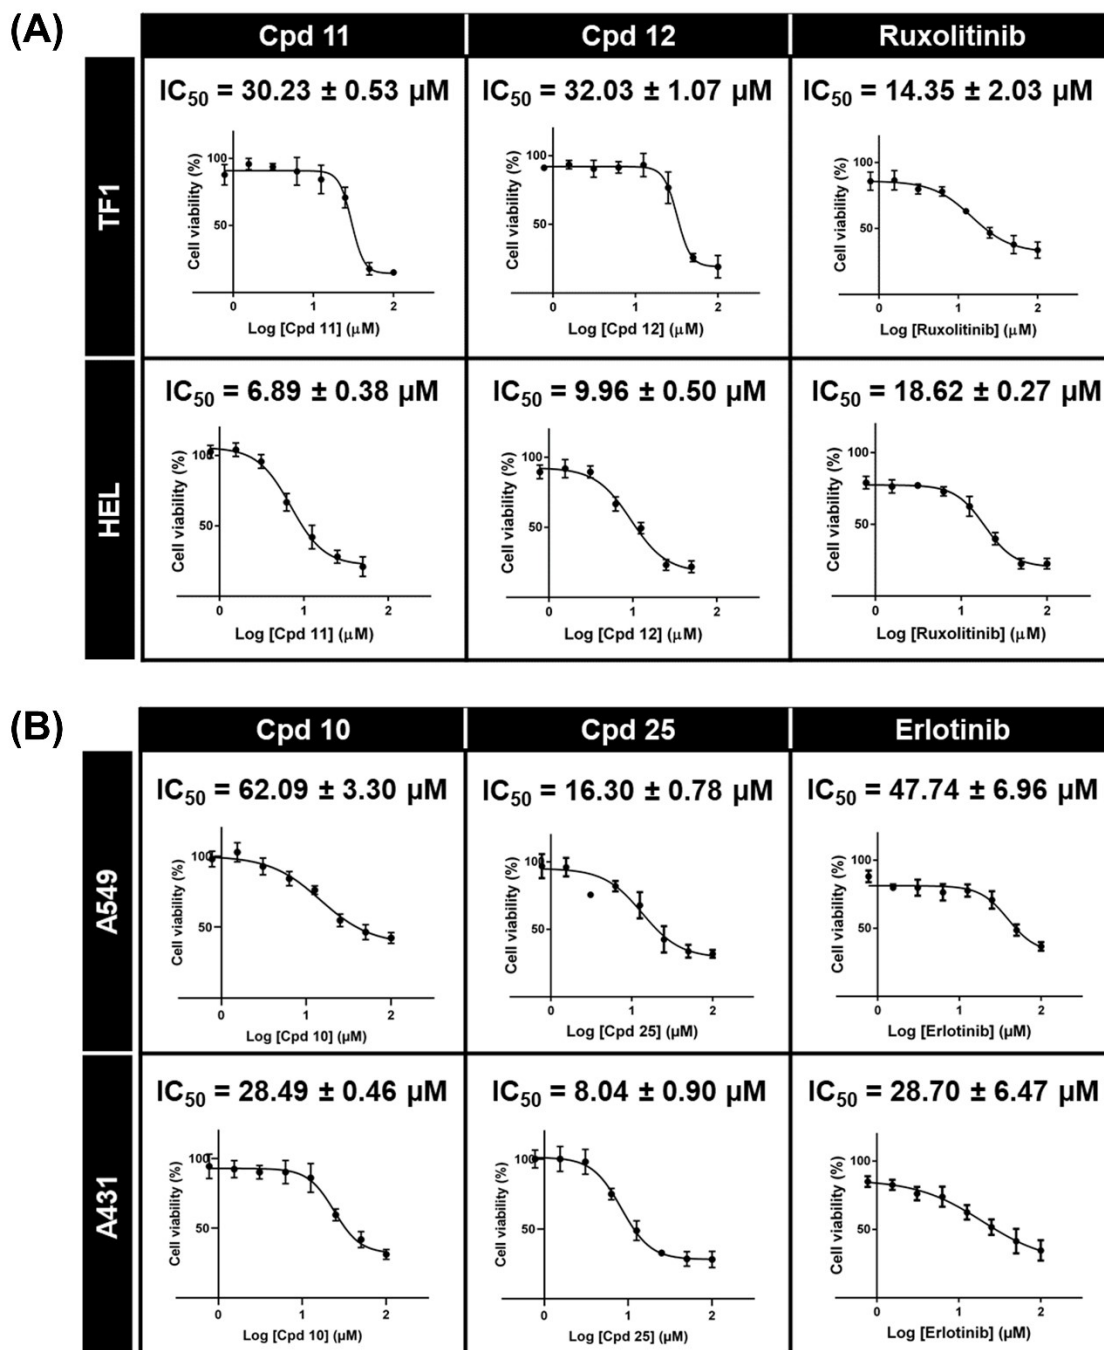

**Figure S2.**  $IC_{50}$  curves of compounds and know drugs towards focused cells (A) TF1, HEL and (B) A549, A431. Data are represented as means  $\pm$  SEM of triplicate experiments.

### 3. Figure S3

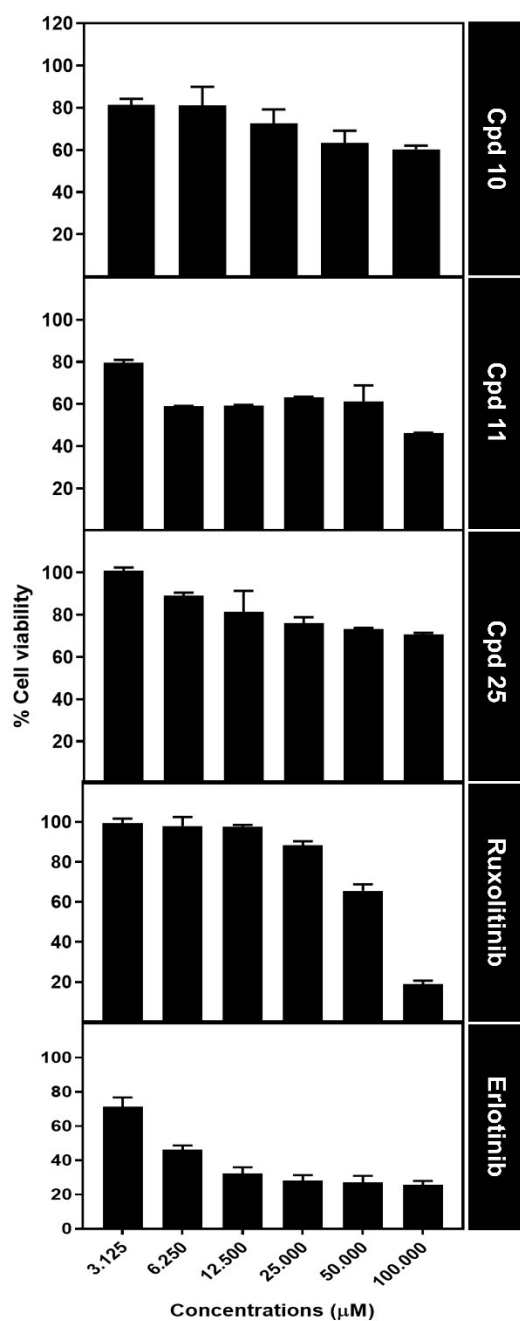

**Figure S3.** Cytotoxicity of compounds and know drugs towards Vero cells. Data are represented as means  $\pm$  SEM of triplicate experiments.

#### 4. Figures S4

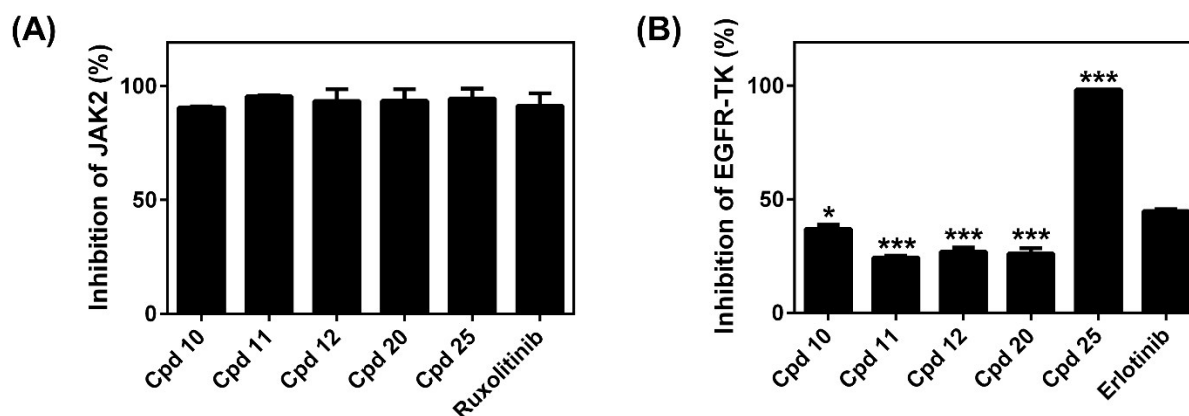

**Figure S4.** Kinase inhibitory activity screening of compounds towards JAK2 and EGFR-TK at 1 μM.

Data are represented as means ± SEM from duplicate independent experiments (n=2). \*  $p \leq 0.05$  and \*\*\*  $p \leq 0.001$  vs. erlotinib in EGFR-TK.

#### 5. Figures S5

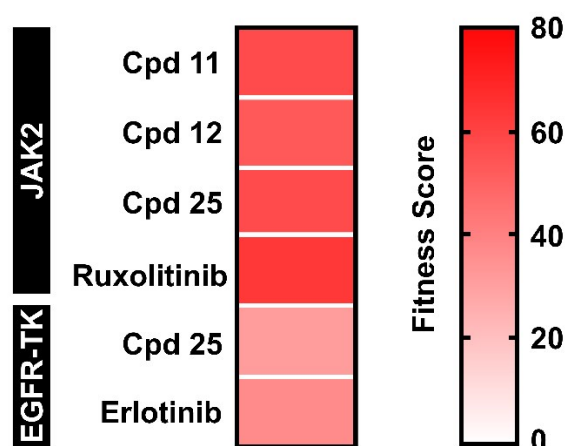

**Figure S5.** The fitness scores of focused thiazole derivatives towards JAK2 and EGFR-TK.

## 6. Table S1

**Table S1.** Interactions of thiazole-based chalcones derivatives as well as the known drugs towards JAK2 and EGFR-TK. Underlined text represents the overlapped residues with the known drugs.

| Protein | Compounds   | Interactions                   |                                                                                                                                                                                                             |           |          |                                                                                  |                  |
|---------|-------------|--------------------------------|-------------------------------------------------------------------------------------------------------------------------------------------------------------------------------------------------------------|-----------|----------|----------------------------------------------------------------------------------|------------------|
|         |             | H bond                         | Van der Waals                                                                                                                                                                                               | Pi-sulfur | Pi-sigma | Pi-Alkyl                                                                         | Amide-Pi Stacked |
| JAK2    | 11          | <u>E930</u> ,<br><u>L932</u>   | <u>K857</u> , <u>S862</u> ,<br>V911, M929,<br><u>P933</u> , <u>G935</u> ,<br><u>S936</u> , <u>G993</u>                                                                                                      | -         | -        | <u>A880</u> ,<br><u>V863</u> ,<br>Y931,<br><u>L983</u>                           | G856,<br>L855    |
|         | 12          | <u>E930</u> ,<br><u>L932</u>   | <u>K857</u> , V863,<br><u>V911</u> M929,<br><u>P933</u> , <u>G935</u> <u>S936</u>                                                                                                                           | -         | G856     | <u>L855</u> ,<br><u>A880</u> ,<br>Y931,<br><u>L983</u>                           | -                |
|         | 25          | K857,<br><u>L932</u>           | <u>G858</u> , E930,<br><u>Y931</u> , <u>P933</u> ,<br><u>G935</u> , <u>S936</u> ,<br>D939, <u>G993</u>                                                                                                      | -         | G856     | <u>L855</u> ,<br><u>V863</u> ,<br><u>A880</u> ,<br>V911,<br>M929,<br><u>L983</u> | -                |
|         | Ruxolitinib | E930,<br>L932                  | G856, K857,<br>G858, G861,<br>S862, K882,<br>V911, Y931,<br>P933, G935,<br>S936, R980,<br>N981, I982,<br>G993, D994                                                                                         | M929      | -        | A880,<br>L855,<br>V863,<br>L983                                                  | -                |
| EGFR-TK | 25          | K721,<br><u>M769</u> ,<br>D831 | <u>V702</u> , <u>K704</u> ,<br><u>A719</u> , <u>E738</u> ,<br><u>M742</u> , <u>L764</u> ,<br><u>T766</u> , <u>Q767</u> ,<br><u>L768</u> , <u>P770</u> ,<br><u>G772</u> , C773,<br><u>L820</u> , <u>T830</u> | -         | -        | <u>L694</u>                                                                      | -                |

| Protein | Compounds | Interactions |                                                                                                                  |           |          |            |                  |
|---------|-----------|--------------|------------------------------------------------------------------------------------------------------------------|-----------|----------|------------|------------------|
|         |           | H bond       | Van der Waals                                                                                                    | Pi-sulfur | Pi-sigma | Pi-Alkyl   | Amide-Pi Stacked |
|         | Erlotinib | M769         | G695, G697, F699, V702, K704, A719, E738, M742, L753, L764, I765, T766, Q767, L768, P770, G772, L820, T830, D831 | C751      | -        | L694, K721 | -                |

## 7. Detail of synthesis and characterization of five compounds (10, 11, 12, 20 and 25)<sup>34</sup>

Synthesis and characterization of five compounds (10, 11, 12, 20 and 25) were published and obtained from Tratatrat C. et al., 2019 <sup>34</sup>as follows:

### 7.1. General Method A (Basic Catalysis)

To a solution of aromatic aldehyde (1 mmol) in 10% NaOH (3-4 mL) at 0° a solution of appropriate 1-(4-methyl-2-alkylamino) thiazol-5-yl) ethanone (1 mmol) in methanol (4.0-4.1 mL), was added dropwise. The solution was maintained at 0 °C for 1.5 h and then was allowed to stir at room temperature. After some time (24-48 h), the solid started separating out. The solid was filtered under vacuum and recrystallized from dioxane or ethanol to give the title chalcones.

### 7.2 General Method B (Acid Catalysis)

To a solution of aromatic aldehyde (1mmol) in conc. H<sub>2</sub>SO<sub>4</sub> (1 -1.5 mL at 0°, a solution of appropriate 1- (4-methyl-2- (alkylamino)thiazol-5-yl) ethanone (1 mmol) in methanol (4.0-4.1 mL), was added dropwise. The solution was maintained at 0 °C for 1.5 h and then was allowed to stir at room temperature. After some time (24-48 h), the solid started separating out. The solid was filtered under vacuum and recrystallized from dioxane or ethanol to give the title chalcones

### 7.3 (E)- 1-(4-methyl-2-(methylamino)thiazol-5-yl)-3-(thiophen-2-yl) prop-2-en-1-on (10)

Yield: 45.2%, m.p. 228- 229 oC, Rf: 0.46 (CHCl<sub>3</sub>:MeOH,9,5:0,5), IR: (cm<sup>-1</sup>, Nujol): 3203 (NH), 3068 (C-H vinyl.), 1628 (C=O), 1602 (C=C), 1559 (C-Harom.). 1 H-NMR: (δ ppm, DMSO-d<sub>6</sub>/CDCl<sub>3</sub>, 300 MHz): 2.52 (s, 3H, thiazole-4'-CH<sub>3</sub>), 2.88 (s, 3H, N-CH<sub>3</sub>), 6.91 (d, J=15 Hz, 1H, CO-CH), 7.09-7.11 (t, 1H, thiophene-4'), 7.42 (d, J=6 Hz, 1H, thiophene-3'), 7.55 (d, J=6 Hz, 1H, thiophene-5'), 7.67 (d, J=15 Hz, 1H, thiophene-2'-CH), 8.31 (s, 1H, NH). Anal. Calc. for C<sub>12</sub>H<sub>12</sub>N<sub>2</sub>O<sub>2</sub>S: C: 54.52; H: 4.58; N: 10.60%. Found: C: 54.55; H: 4.56; N: 10.82%.

### 7.4 (E)-1-(4-methyl-2 -(methylamino)thiazol-5-yl)-3-(thiazol-2-yl) prop-2-en-1-on (11)

Yield: 67.2%, m.p. 227- 228 oC, Rf: 0.32 (CHCl<sub>3</sub>: MeOH, 9.5:0.5). IR: (cm<sup>-1</sup>, Nujol): 3207 (NH), 3072 (C-H vinyl.), 1628 (C=O), 1605 (C=C), 1556 (C-H arom.). 1 H-NMR: (δ ppm, DMSO-d<sub>6</sub>/CDCl<sub>3</sub>, 300 MHz): 2.55 (s, 3H, thiazole-4'-CH<sub>3</sub>), 2.89 (s, 3H, CH<sub>3</sub>-N), 7.42 (d, J=15 Hz, 1H, CO-CH), 7.60 (d, J=15 Hz, 1H, thiazole-2''-CH), 7.72 (d, J=3 Hz, 1H, thiazole 5'), 7.92 (d, J=3 Hz, 1H, thiazole-4''), 8.43 (s, 1H, NH). Anal. Calc. for C<sub>11</sub>H<sub>11</sub>N<sub>3</sub>O<sub>2</sub>S: C: 49.79; H: 4.18; N: 15.84%. Found: C: 49.50; H: 4.21; N: 15.61%.

### 7.5 (E)- 1-(4-methyl-2-(methylamino)thiazol-5-yl)-3-(thiophen-2-yl) prop-2-en-1-on (12)

Yield: 29.0%, m.p. 212-213 oC, Rf: 0.47 (CHCl<sub>3</sub>: MeOH, 9.5:0.5). IR: (cm<sup>-1</sup>, Nujol): 3198 (NH), 3082 (C-H vinyl.), 1634 (C=O), 1597 (C=C), 1560 (C-H arom.). H-NMR: (δ ppm, DMSO-d<sub>6</sub>, 300 MHz): 2.53 (s, 3H, thiazole-4'-CH<sub>3</sub>), 2.86 (s, 3H, CH<sub>3</sub>-N), 7.10 (d, J=15 Hz, 1H, CO-CH), 7.52-7.61 (m, 4H, thiophene-3'-CH, thiophene. 2',4',5'), 7.96 (s, 1H, NH). Anal. Calc. for C<sub>12</sub>H<sub>12</sub>N<sub>2</sub>O<sub>2</sub>S: C: 54.52, H: 4.58, N: 10.60%. Found: C: 54.10, H: 4.5, N: 10.44%.

### 7.6 (E)-1- (4--methyl-2-(ethylamino)thiazol-5-yl)-3-(4-hydroxyphenyl) prop-2-en-1-on (20)

Method B. Reaction time 30 h. Yield: 25.5%, m.p. 246- 248 °C (dioxane), Rf: 0.44 (toluene:EtOH: 8/2). IR: (cm<sup>-1</sup>, KBr) 3265 (NH), 1645 (C=O). <sup>1</sup>H-NMR: (δ ppm, 250 MHz, DMSO-d<sub>6</sub>) δ= 1.19 (t, J= 7.1 Hz, 3 H, CH<sub>3</sub>CH<sub>2</sub>N-), 2.56 (s, 3 H, thiazole 4'-CH<sub>3</sub>), 3.21- 3.36 (m, 2 H, N-CH<sub>2</sub>CH<sub>3</sub>), 6.82 (d, J=7.7 Hz, 2 H, Ar. 2',6'), 7.10 (d, J=15.1 Hz, 1 H, allylic CO-CH), 7.51 (d, J=16.1 Hz, 1 H, allylic Ar-CH), 7.61 (d, J= 7.6 Hz, 2 H, Ar. 3',5'), 8.80 (br, 1 H, NH), 10.03 (s, 1 H, PhOH). Anal. Calc. for C<sub>15</sub>H<sub>16</sub>N<sub>2</sub>O<sub>2</sub>S (288.09): C:62.48; H: 5.59; N: 9.71%. Found: C:62.49; H: 5.57; N: 9.70%.

### 7.7 (E)-1-(4 --methyl-2-(methylamino)thiazol-5-yl)-3-(4-hydroxyphenyl) prop-2-en-1-on (25)

Method B. Reaction time 30 h. Yield: 17.1%, m.p. 253- 255 °C (dioxane), Rf: 0.41 (toluene:EtOH: 8/2). IR: (cm<sup>-1</sup>, KBr) 3209 (NH), 1650 (C=O). <sup>1</sup>H-NMR: (δ ppm, 250 MHz, DMSO-d<sub>6</sub>) δ= 2.57 (s, 3 H, thiazole 4'-CH<sub>3</sub>), 2.93 (s, 3 H, N-CH<sub>3</sub>), 6.83 (d, J=8.2 Hz, 2H, Ar. 2',6'), 7.09 (d, J=15.3 Hz, 1H, allylic CO-CH), 7.52 (d, J=15.4 Hz, 1 H, allylic Ar -CH), 7.60 (d, J=8.2 Hz, 2 H, Ar. 3',5'), 8.91 (br, 1 H, NH). Anal. Calc. for C<sub>14</sub>H<sub>14</sub>N<sub>2</sub>O<sub>2</sub>S (274.8): C 61.29; H: 5.14; N: 10.21%. Found: C:61.32; H: 5.15; N: 10.22%.

## 8. Figure S6

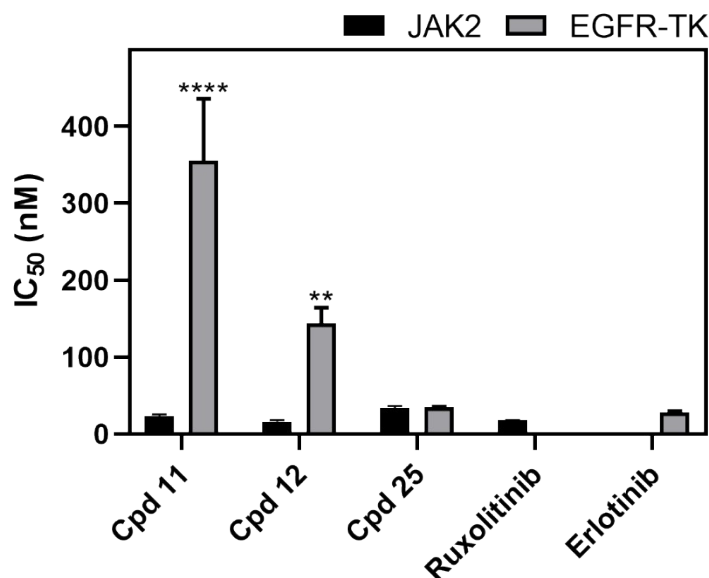

**Figure S6.** IC<sub>50</sub> of kinase inhibitory activity of compounds towards JAK2 and EGFR-TK. Data are represented as means ± SEM from triplicate independent experiments (n=3). \*\*  $p \leq 0.01$  and \*\*\*\*  $p \leq 0.0001$  vs. erlotinib in EGFR-TK.
