# Supplementary material
Source: PubMed Central journal article supplement (PMC8130606)

# (A) JAK2/Tofacitinib

# (B) EGFR-TK/Erlotinib

■ Structure from X-ray

■ Structure from GOLD

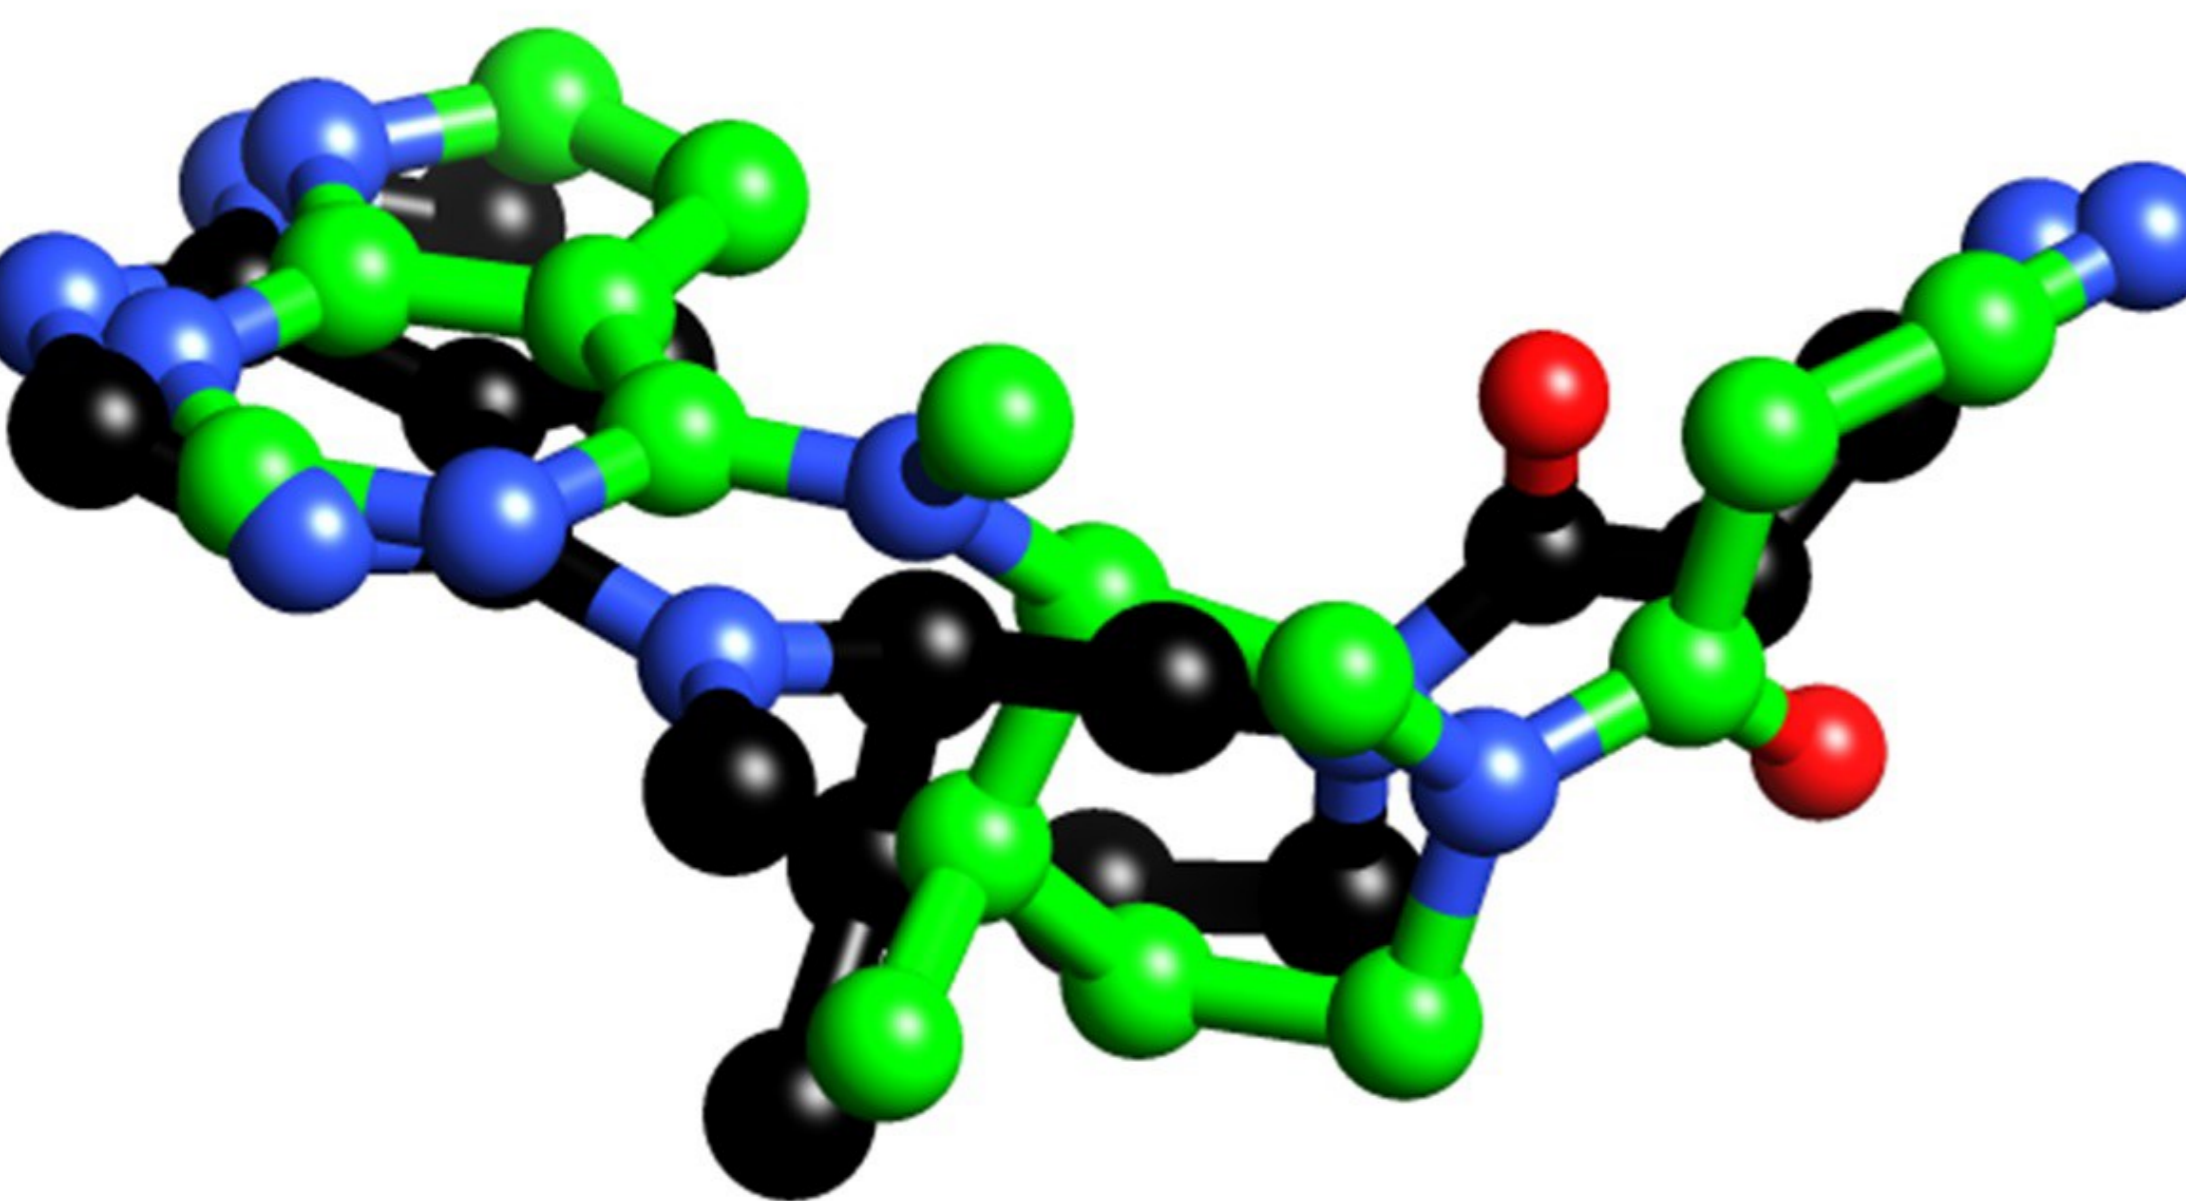

RMSD = 1.07 Å

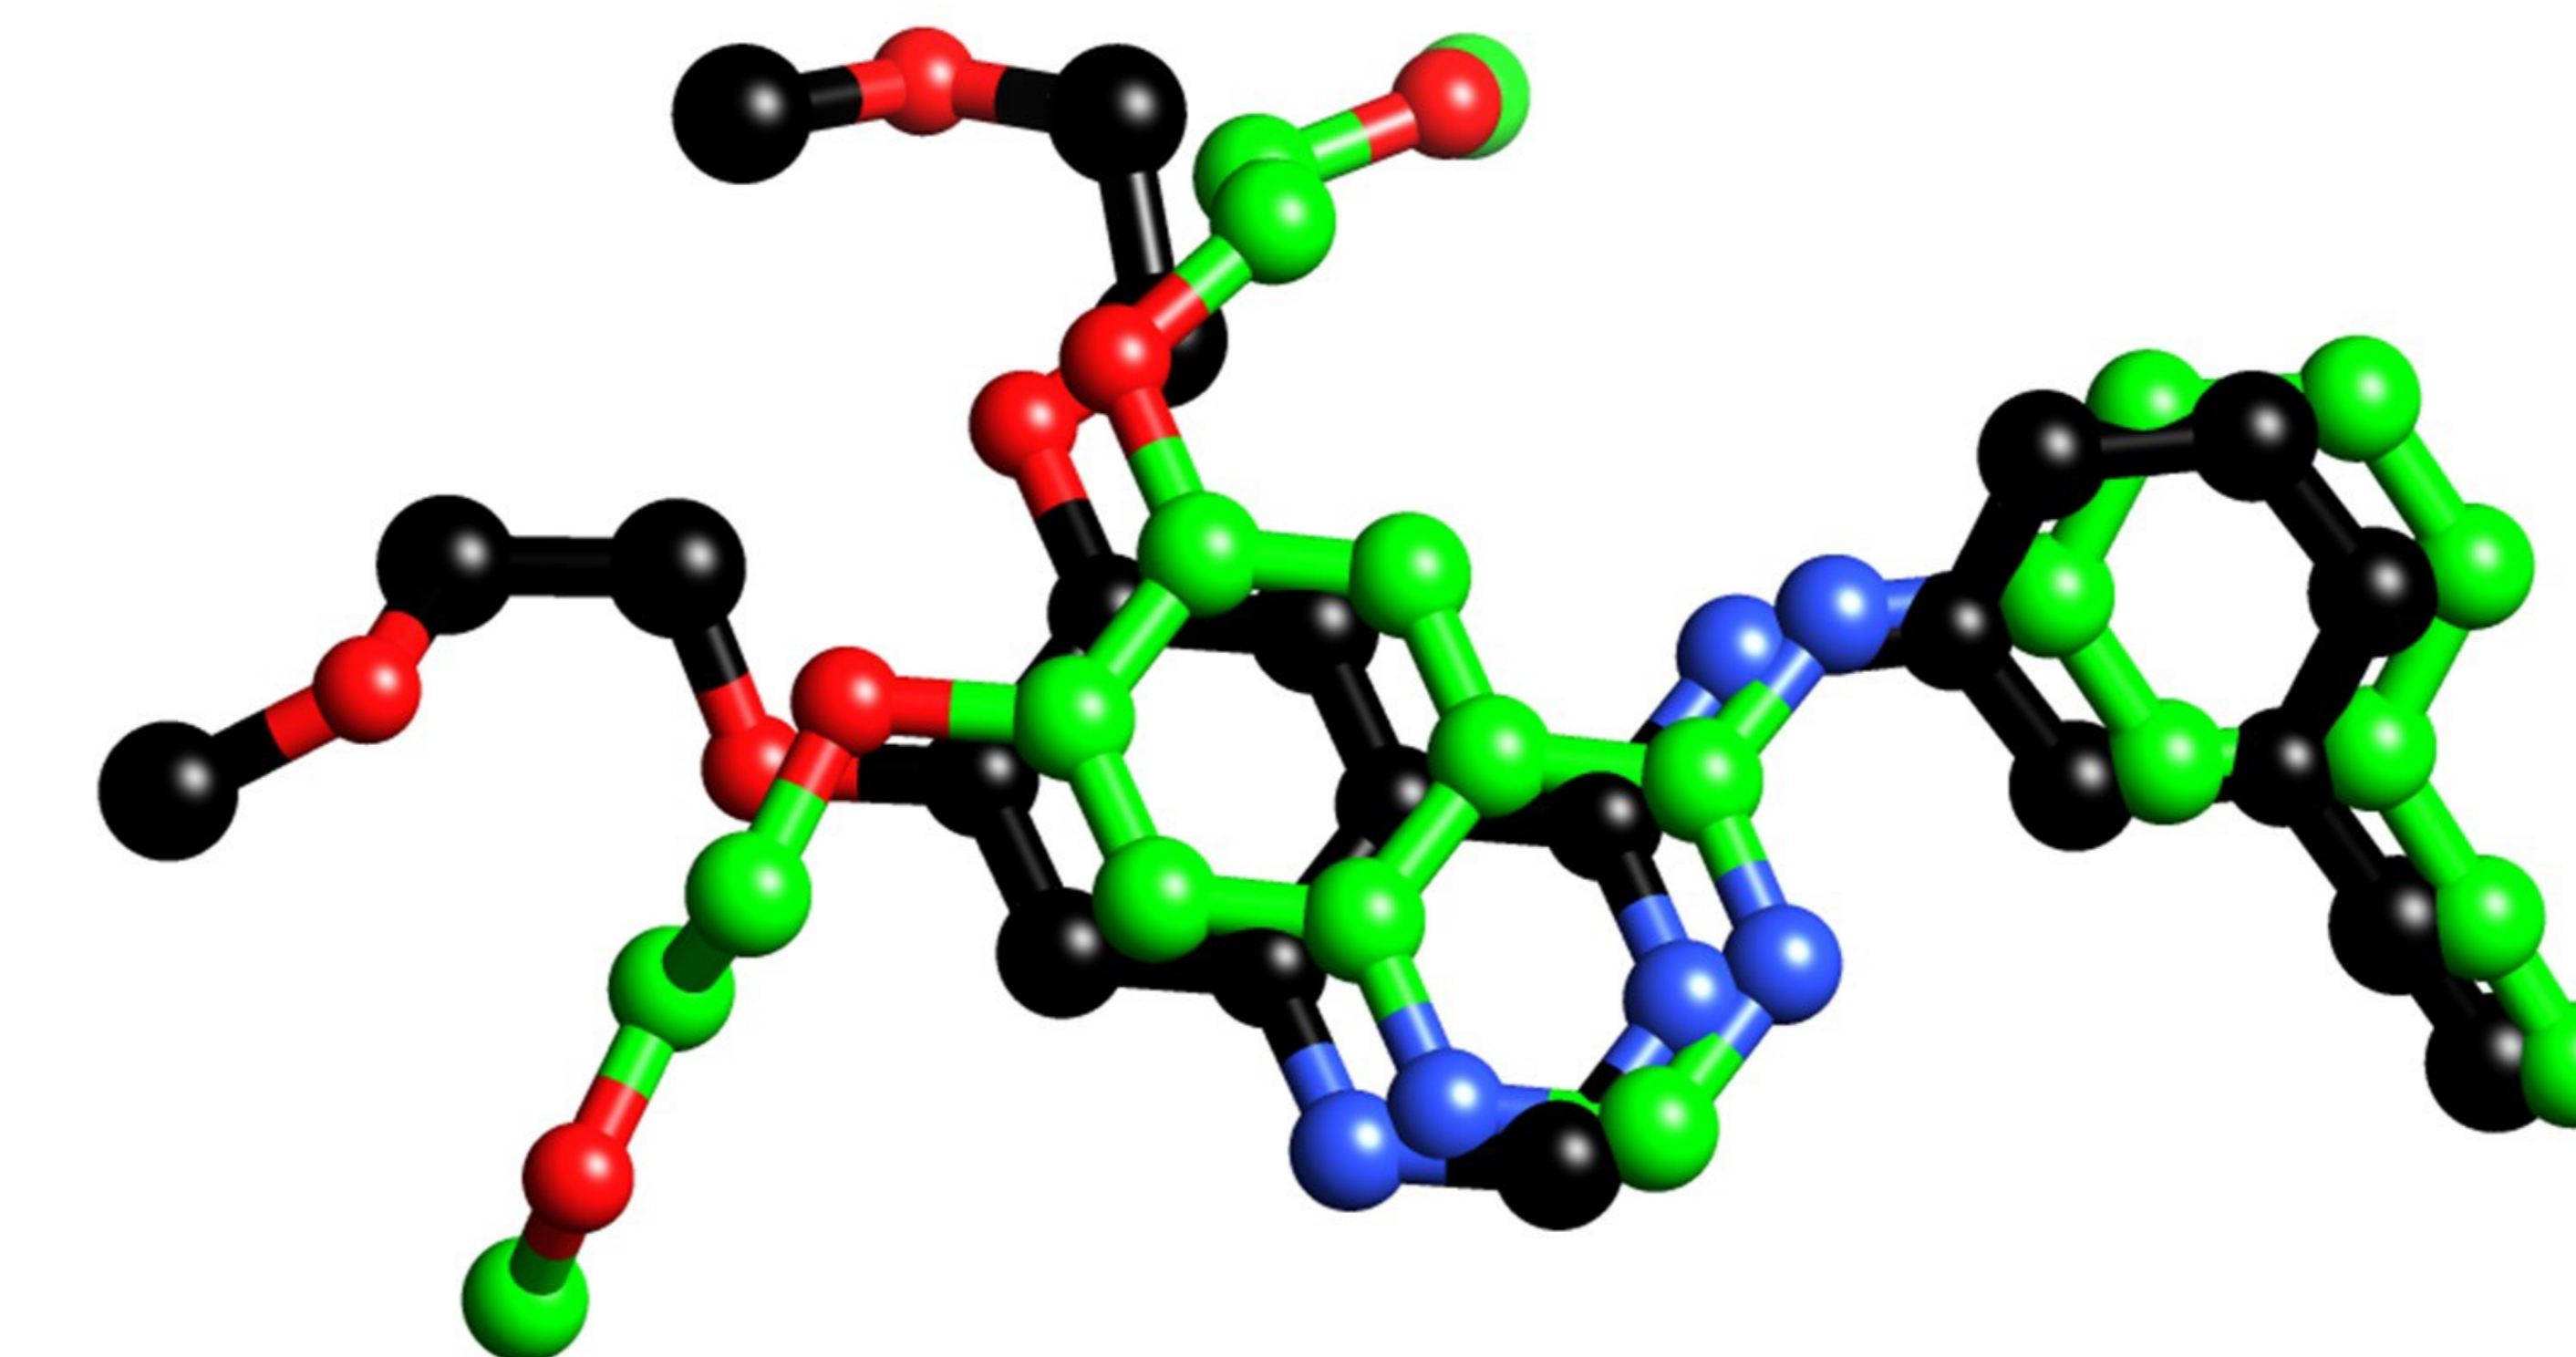

RMSD = 1.96 Å

Supplement: MD-012-D0MD00436G-s003.pdf [file MD-012-D0MD00436G-s003.pdf]

(A)

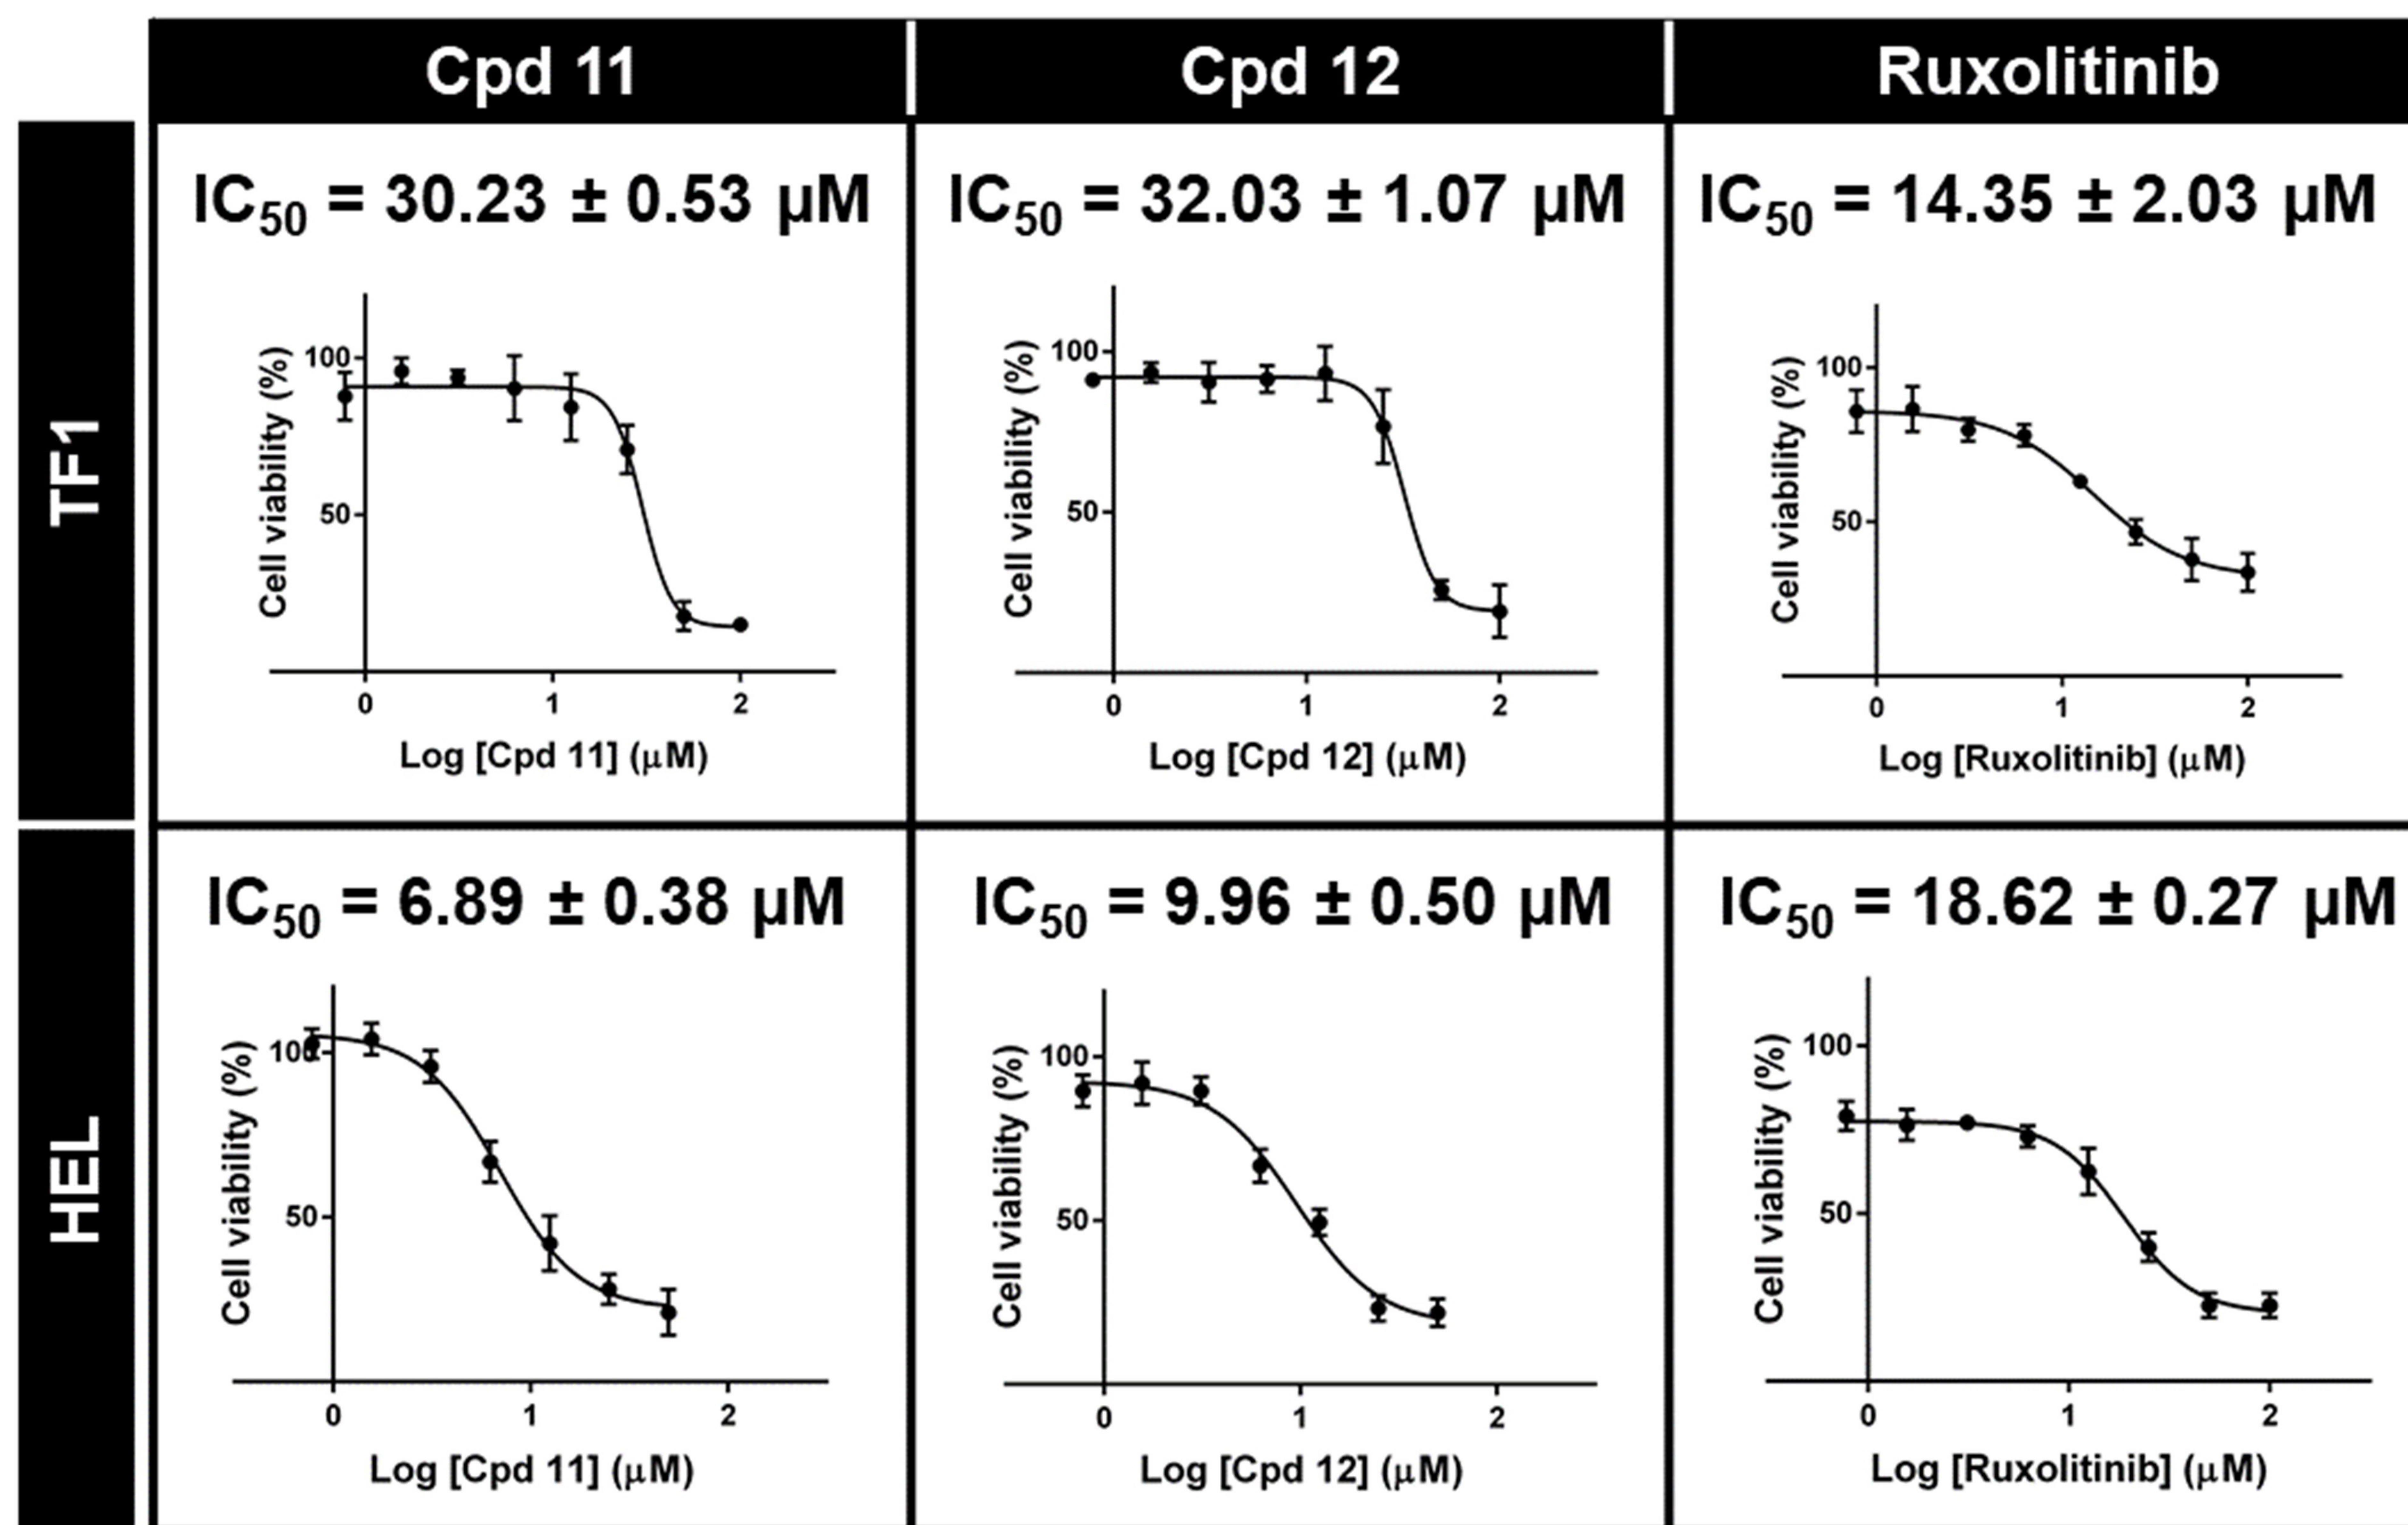

(B)

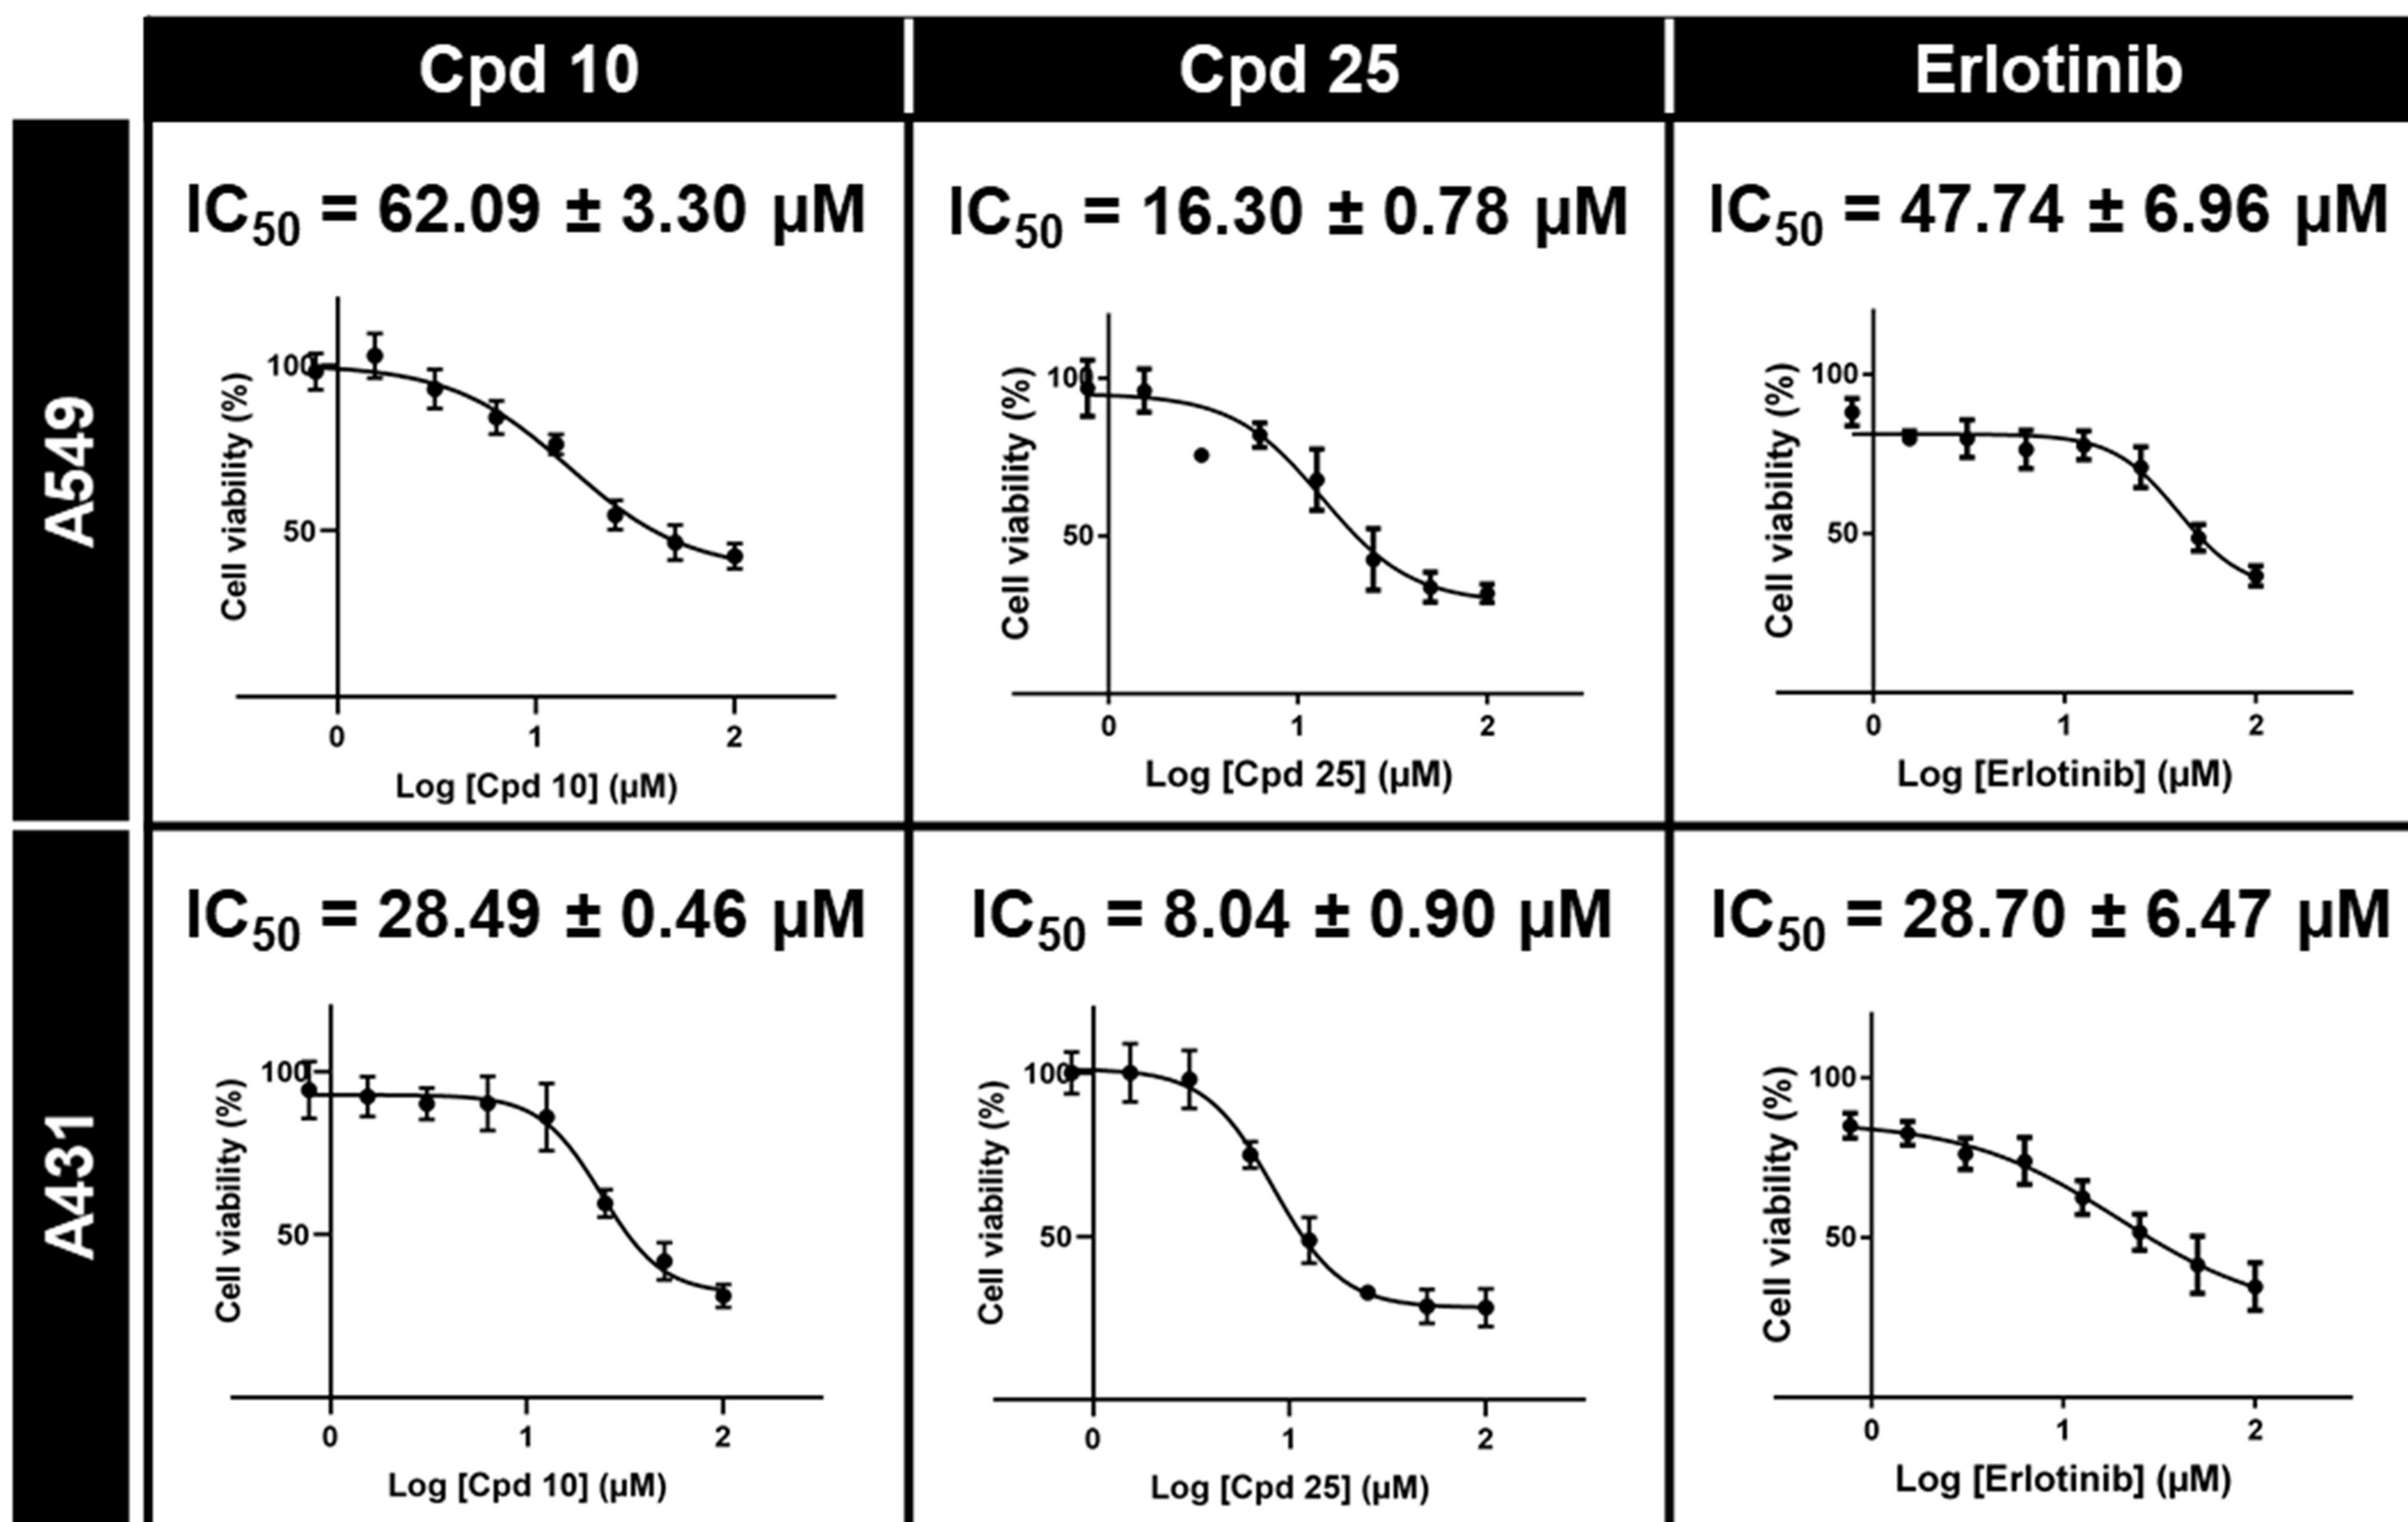

Supplement: MD-012-D0MD00436G-s004.pdf [file MD-012-D0MD00436G-s004.pdf]

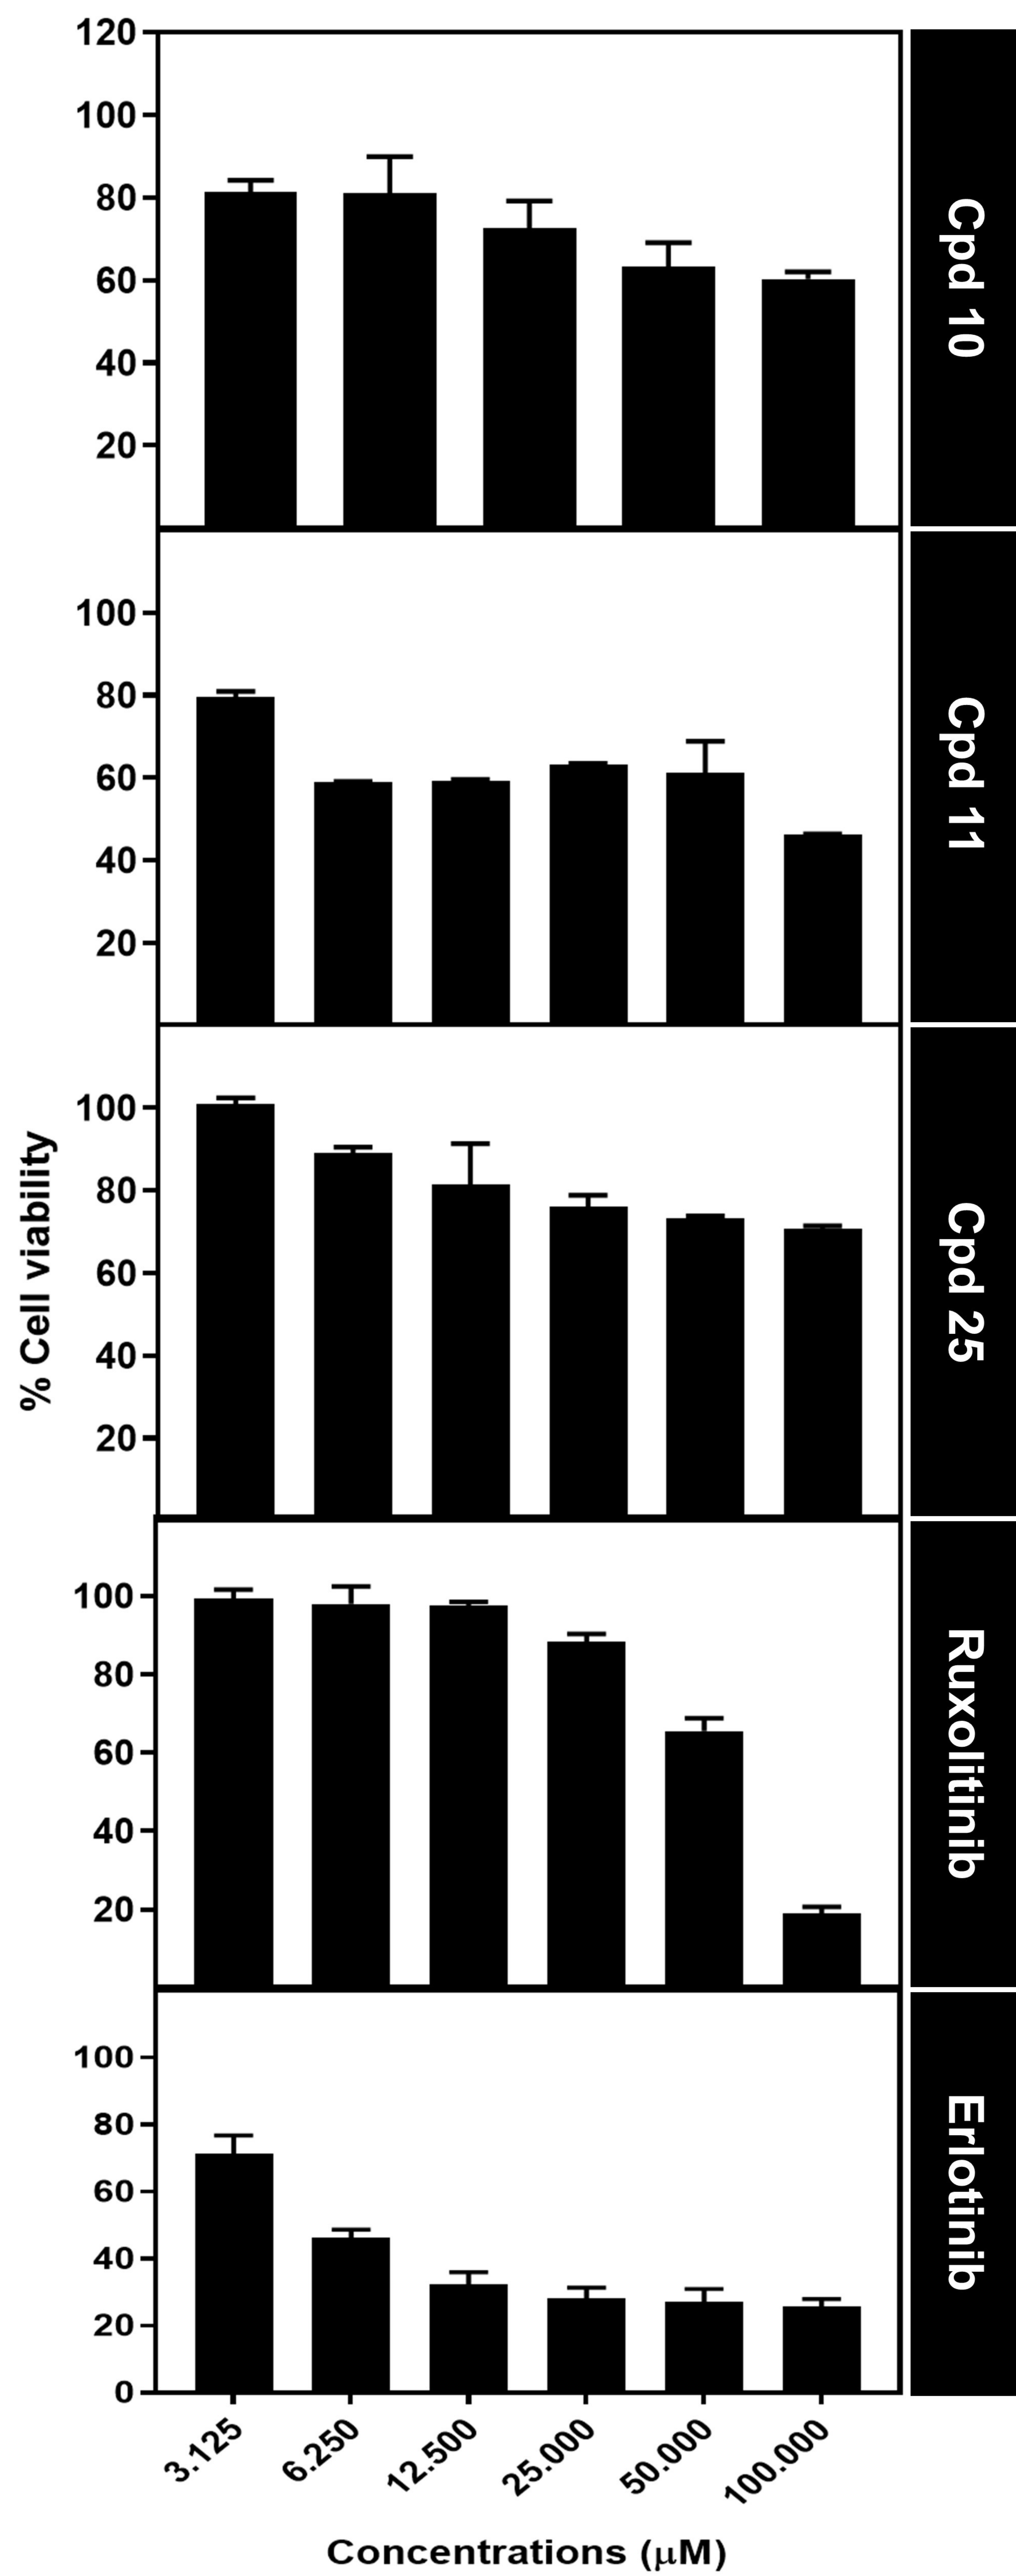

Supplement: MD-012-D0MD00436G-s005.pdf [file MD-012-D0MD00436G-s005.pdf]

**(A)**

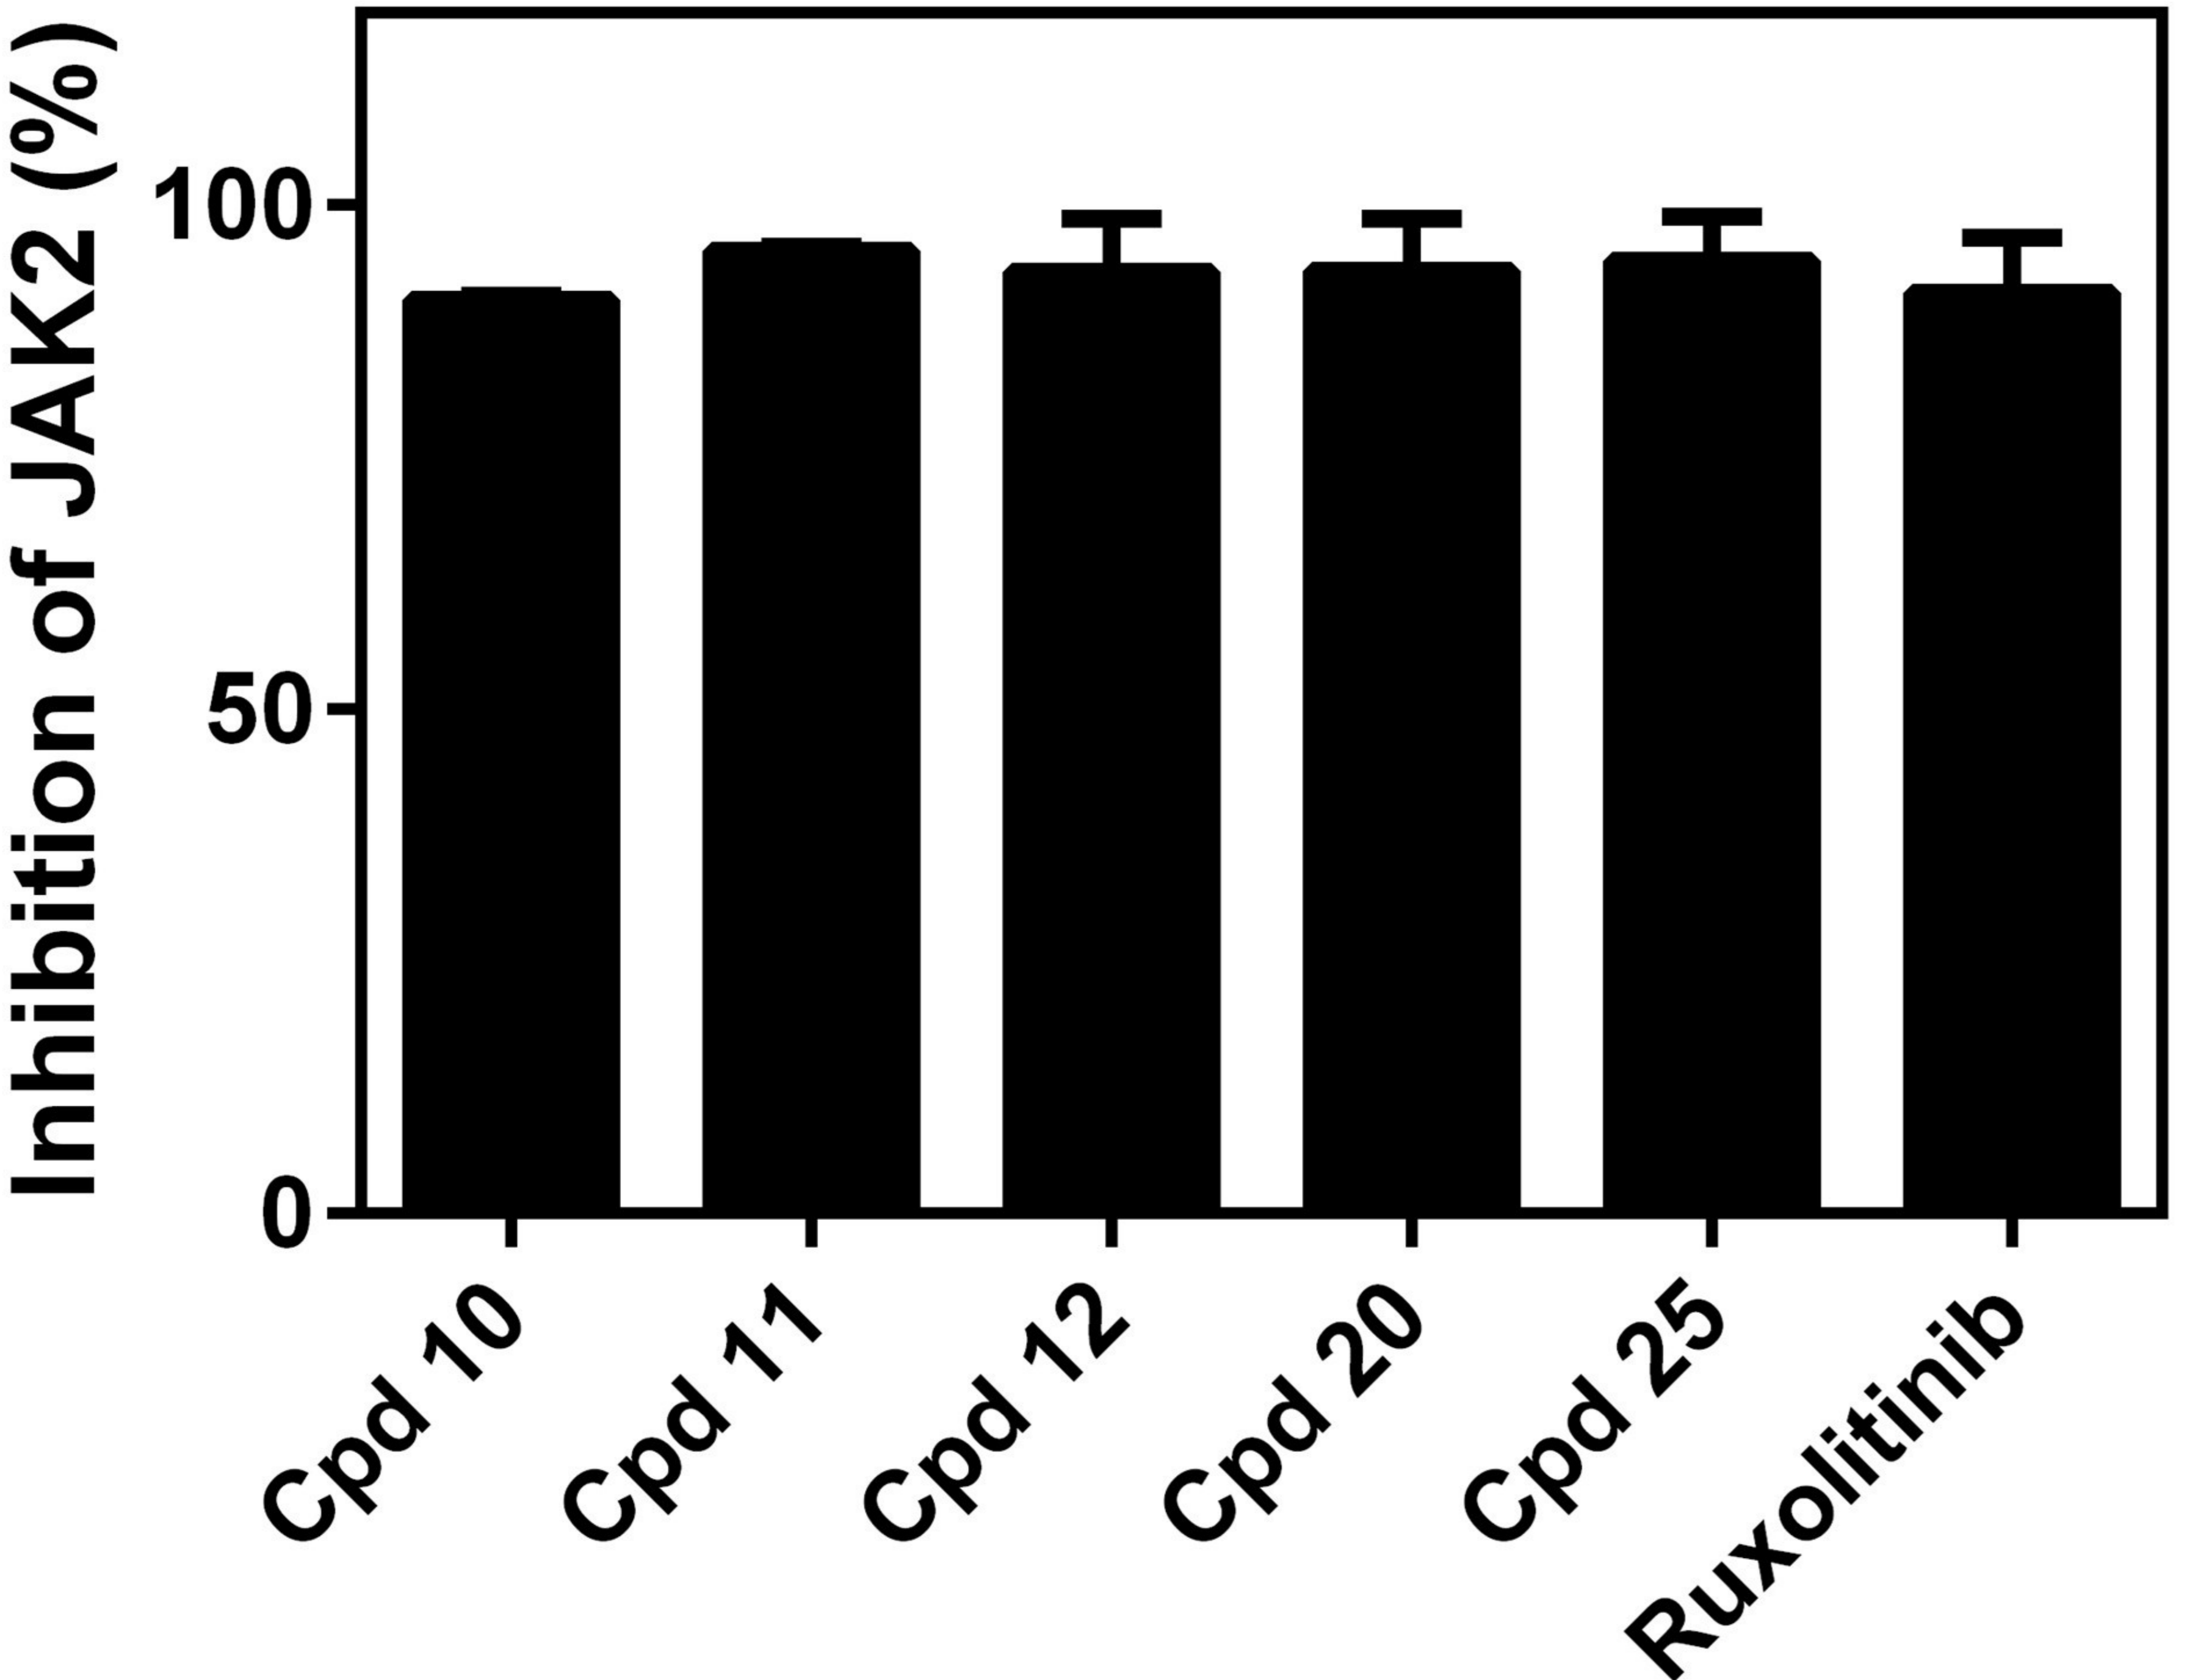

**(B)**

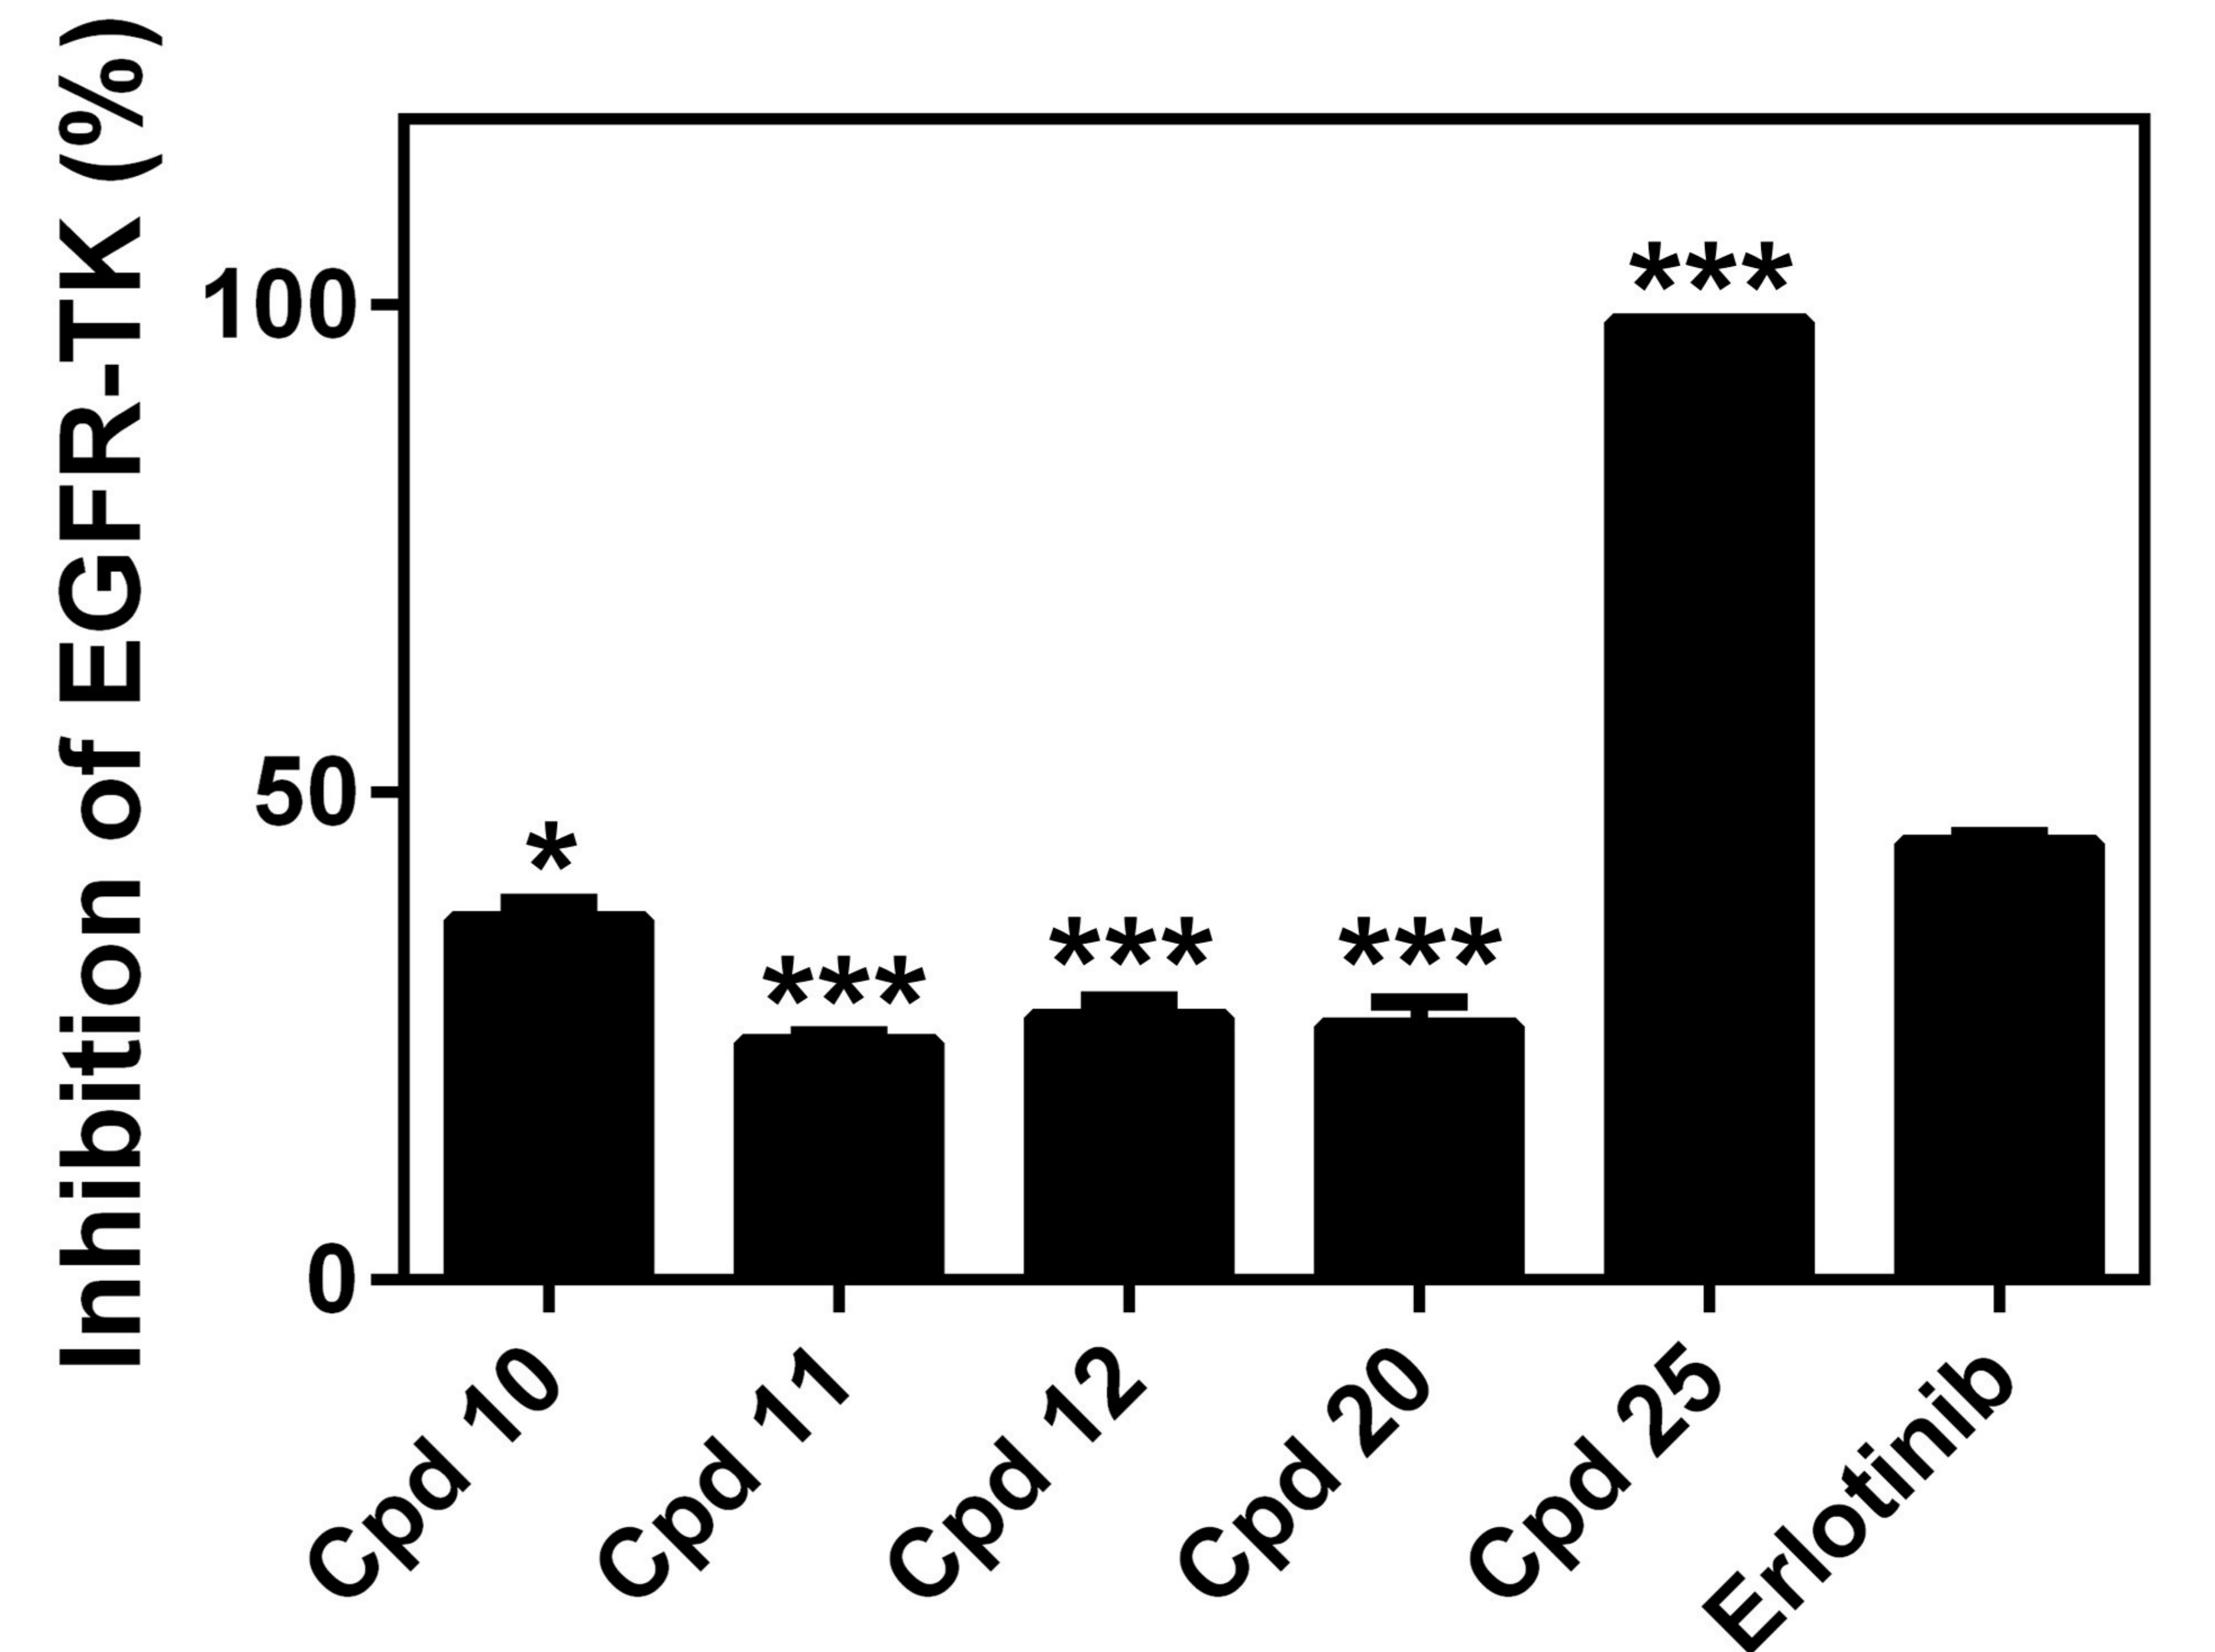

Supplement: MD-012-D0MD00436G-s006.pdf [file MD-012-D0MD00436G-s006.pdf]

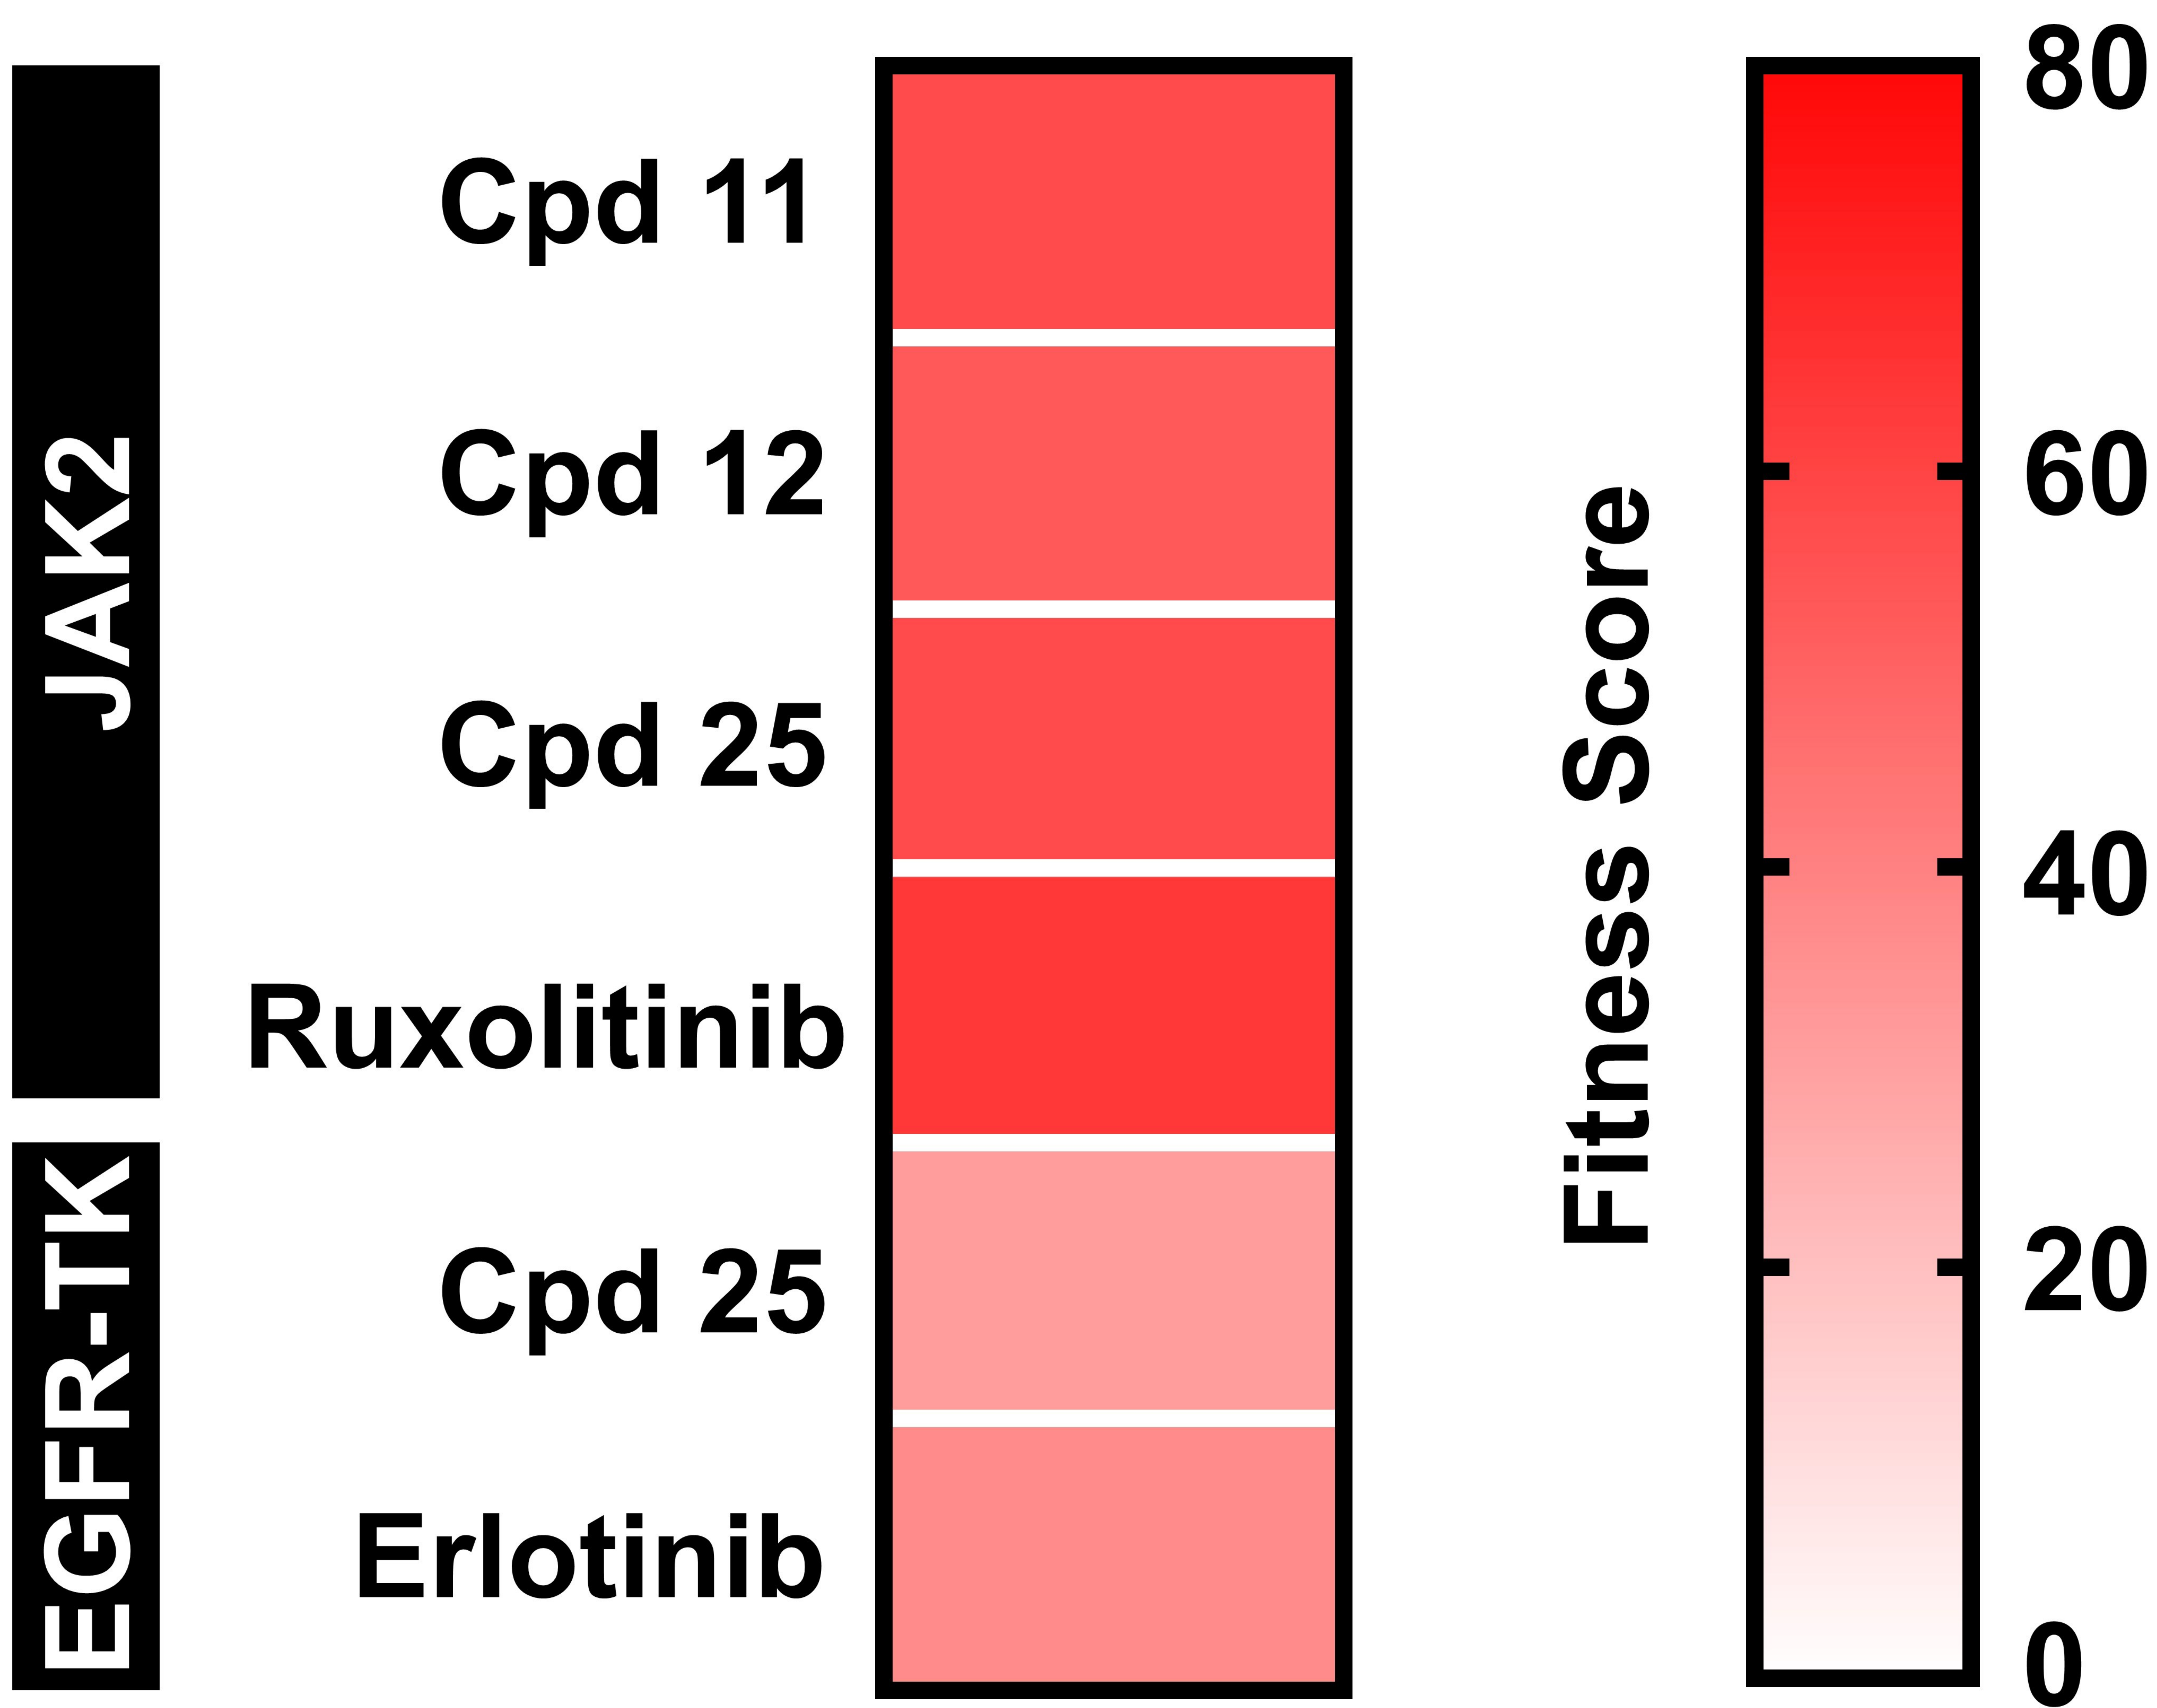

Supplement: MD-012-D0MD00436G-s007.pdf [file MD-012-D0MD00436G-s007.pdf]

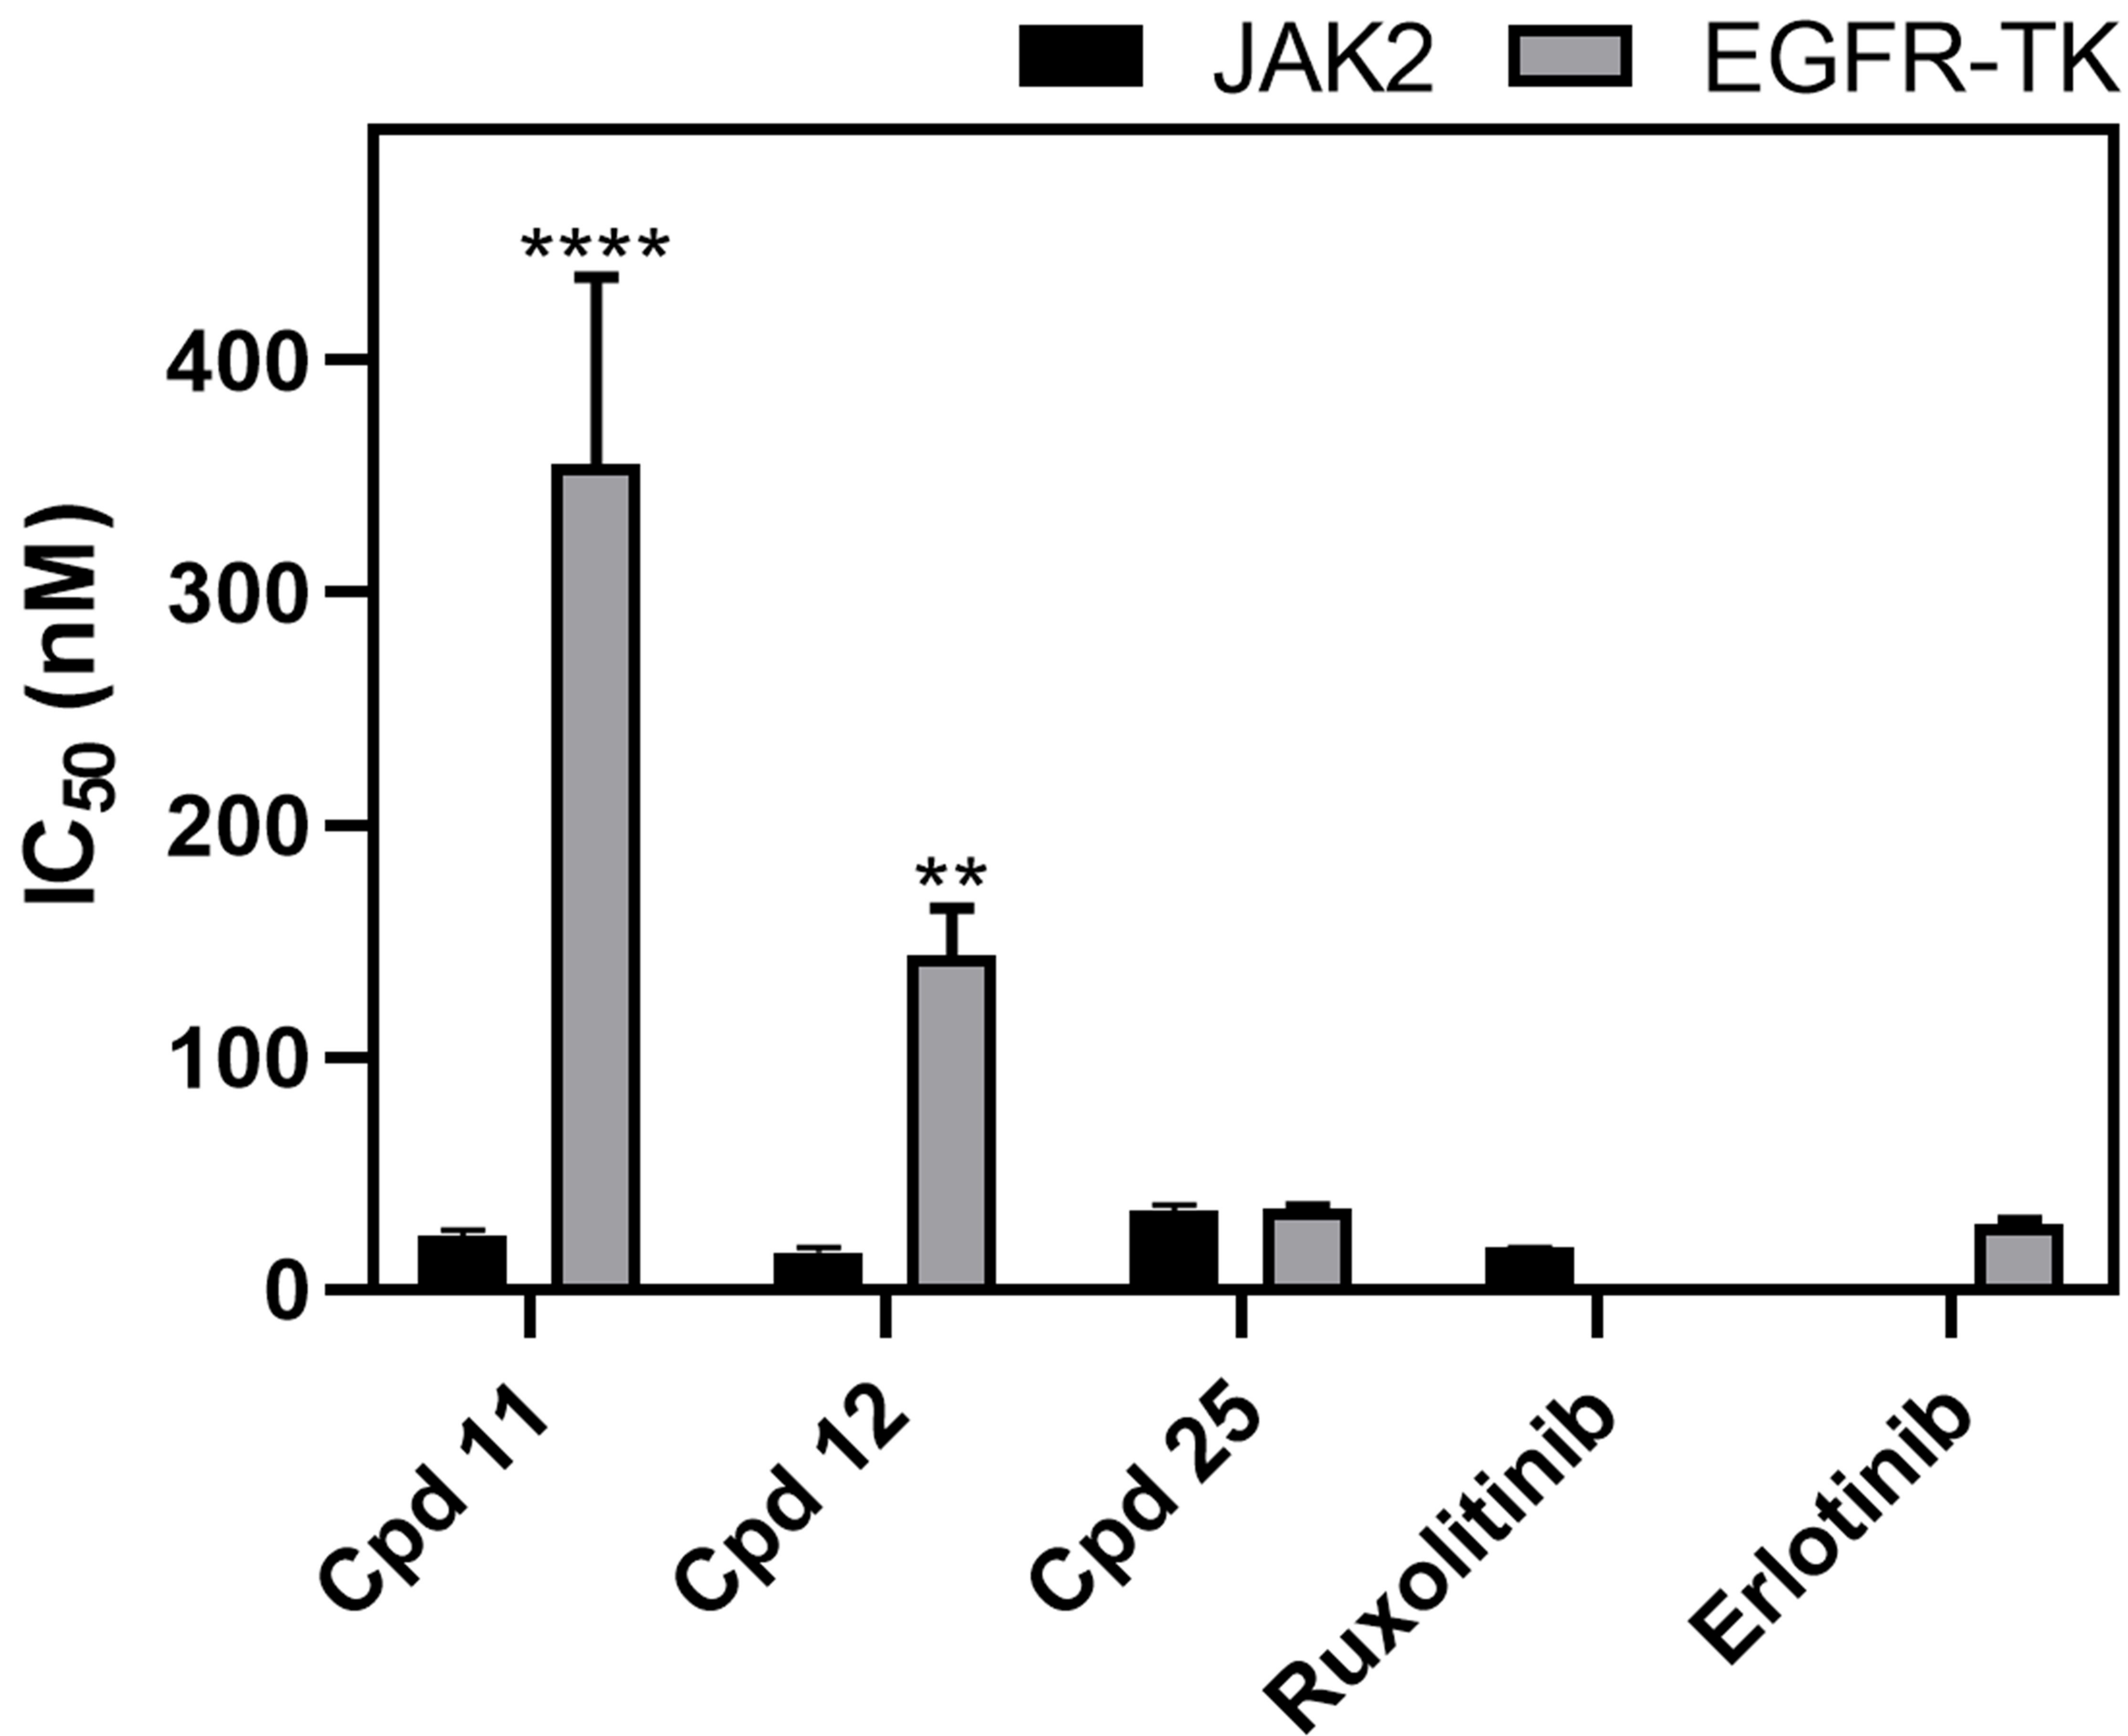

Supplement: MD-012-D0MD00436G-s008.pdf [file MD-012-D0MD00436G-s008.pdf]
